# Supplementary material for: SR1—a small RNA with two remarkably conserved functions
Source: PubMed Central journal article supplement — Nucleic Acids Res. 2012 Oct 2;40(22):11659–72. doi: 10.1093/nar/gks895 (PMC3526287; doi:10.1093/nar/gks895), 2012-10-02
Supplement: supp_gks895_nar-01830-c-2012-File002.pdf [file supp_gks895_nar-01830-c-2012-File002.pdf]

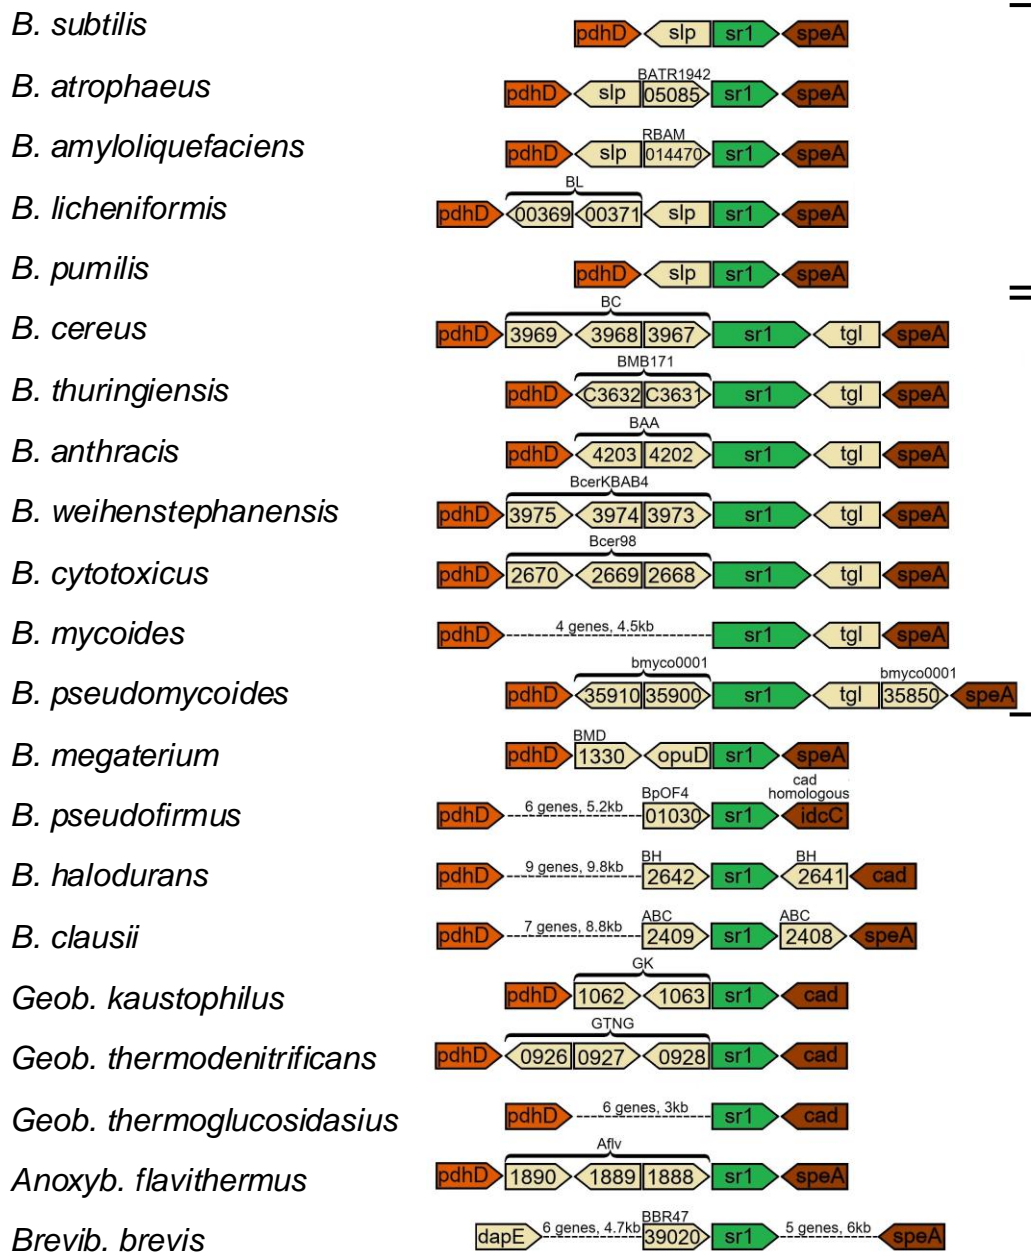

**Figure S1. Gene synteny of the region centred on *sr1***

The gene synteny of each specific *sr1* homologue is shown with the homologue in green. The genes encoding PdhD and SpeA/Cad are considered boundaries of the region and shown in red and dark red, respectively. The *sr1p* ORF is present in all cases in comparable locations. In *B. pseudofirmus*, *B. halodurans*, *B. clausii*, *Geob. thermoglucosidasius* and *Brev. brevis*, the gene encoding PdhD or its analogue is located further upstream of *sr1*, shown by the dashed line and stated distance; the additional genes between *sr1* and *pdhD* are not individually represented. The same holds true for *Brev. brevis*, whose *speA* gene is located further downstream from *sr1*. The gene arrangements for the *sr1* homologues from *B. coagulans* and *B. coahuilensis* are not included as genome sequencing and annotation are not yet complete. I, *B. subtilis* group; II, *B. cereus* group.

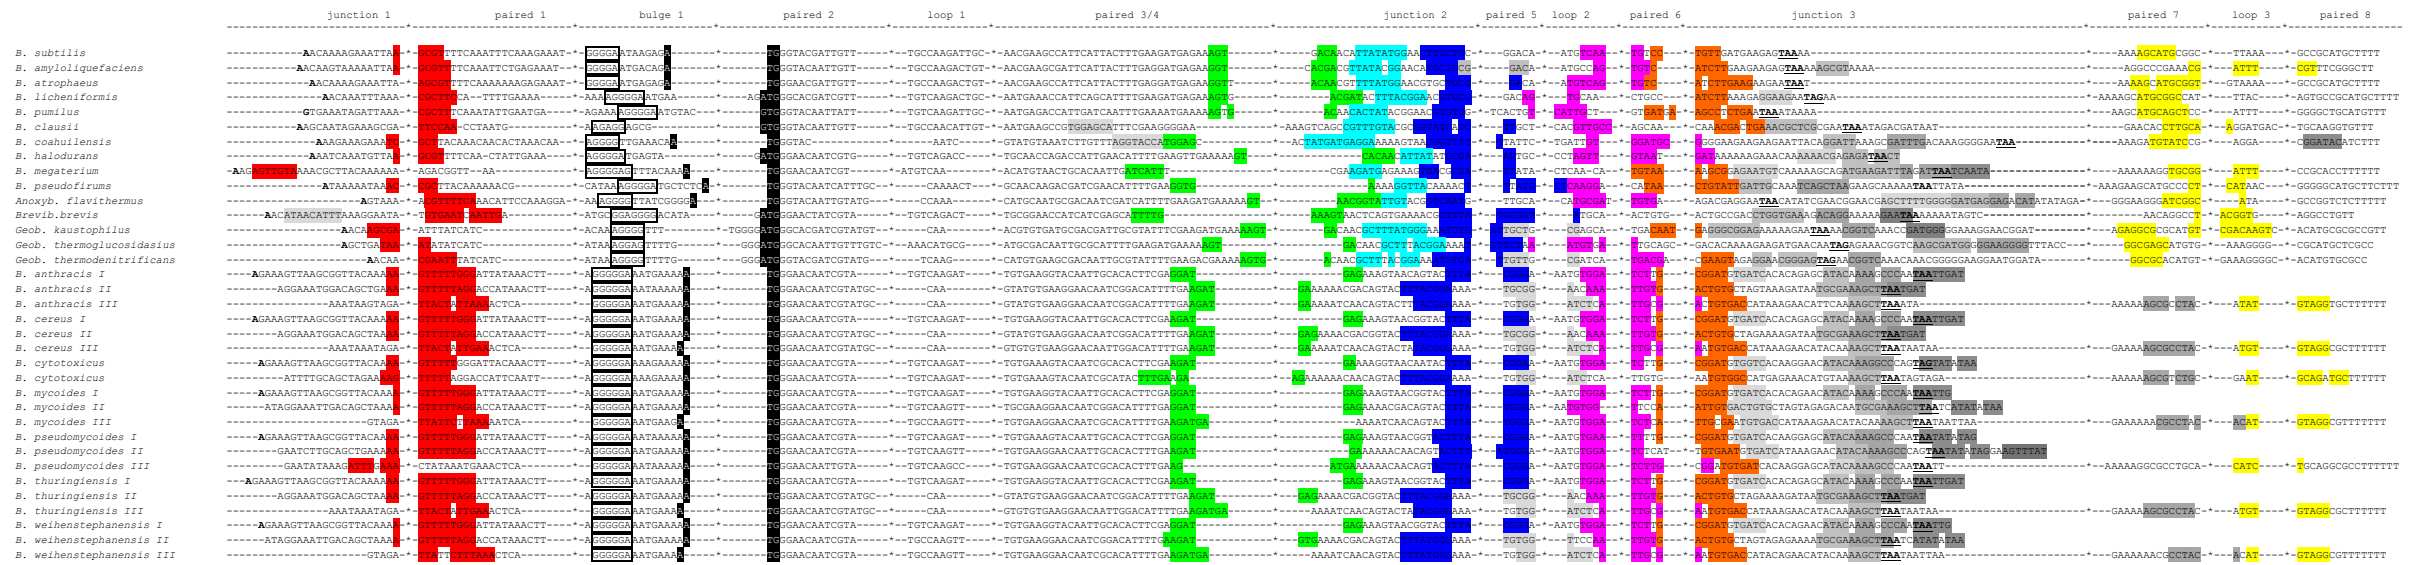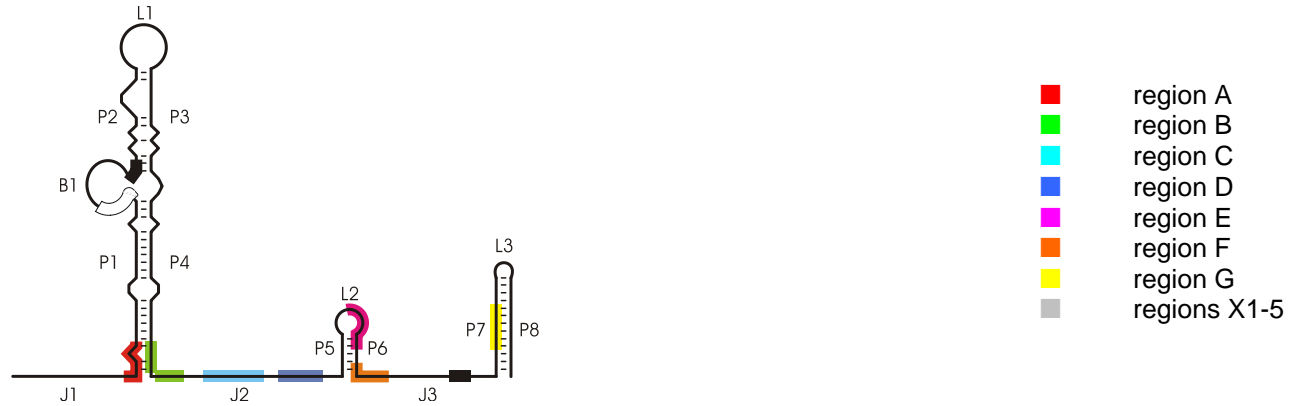

**Figure S2. Alignment of SR1 sequences**

The nucleotide sequences of the SR1 homologues were aligned based on the predicted RNA secondary structures. Start codons are highlighted in black, SD sequences are boxed, and stop codons are in bold and underlined. Regions complementary to the corresponding *ahrC* homologues are highlighted in colour. Above, paired regions, loops and single-stranded junctions between stem-loops are indicated. Below, the secondary structure of *B. subtilis* SR1 with the accordingly coloured complementary regions is shown.

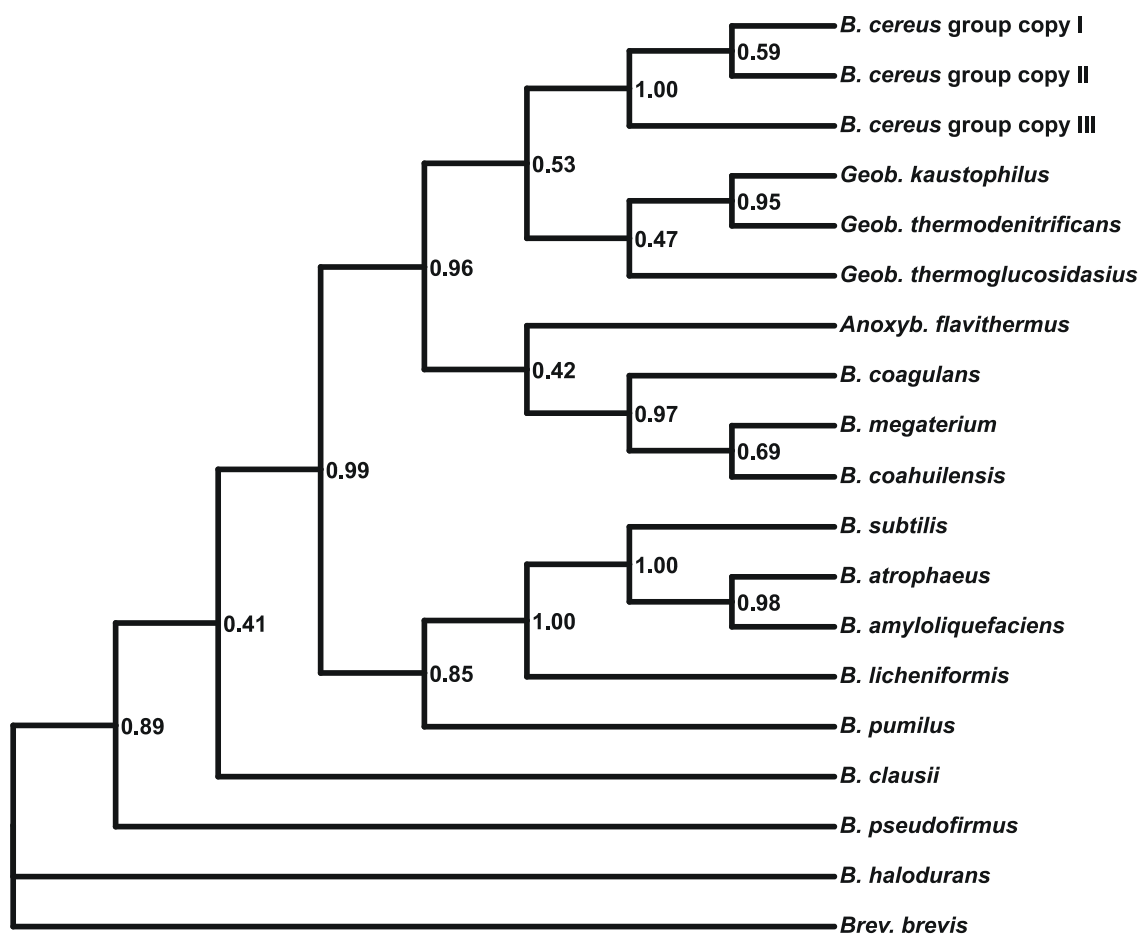

**Figure S3. Phylogenetic tree based on the nt sequence of the SR1 homologues.**

The phylogenetic tree was generated as described in Materials and Methods. A consensus sequence for each SR1 copy of the *B. cereus* group members was derived and used as representative of the entire *B. cereus* group.

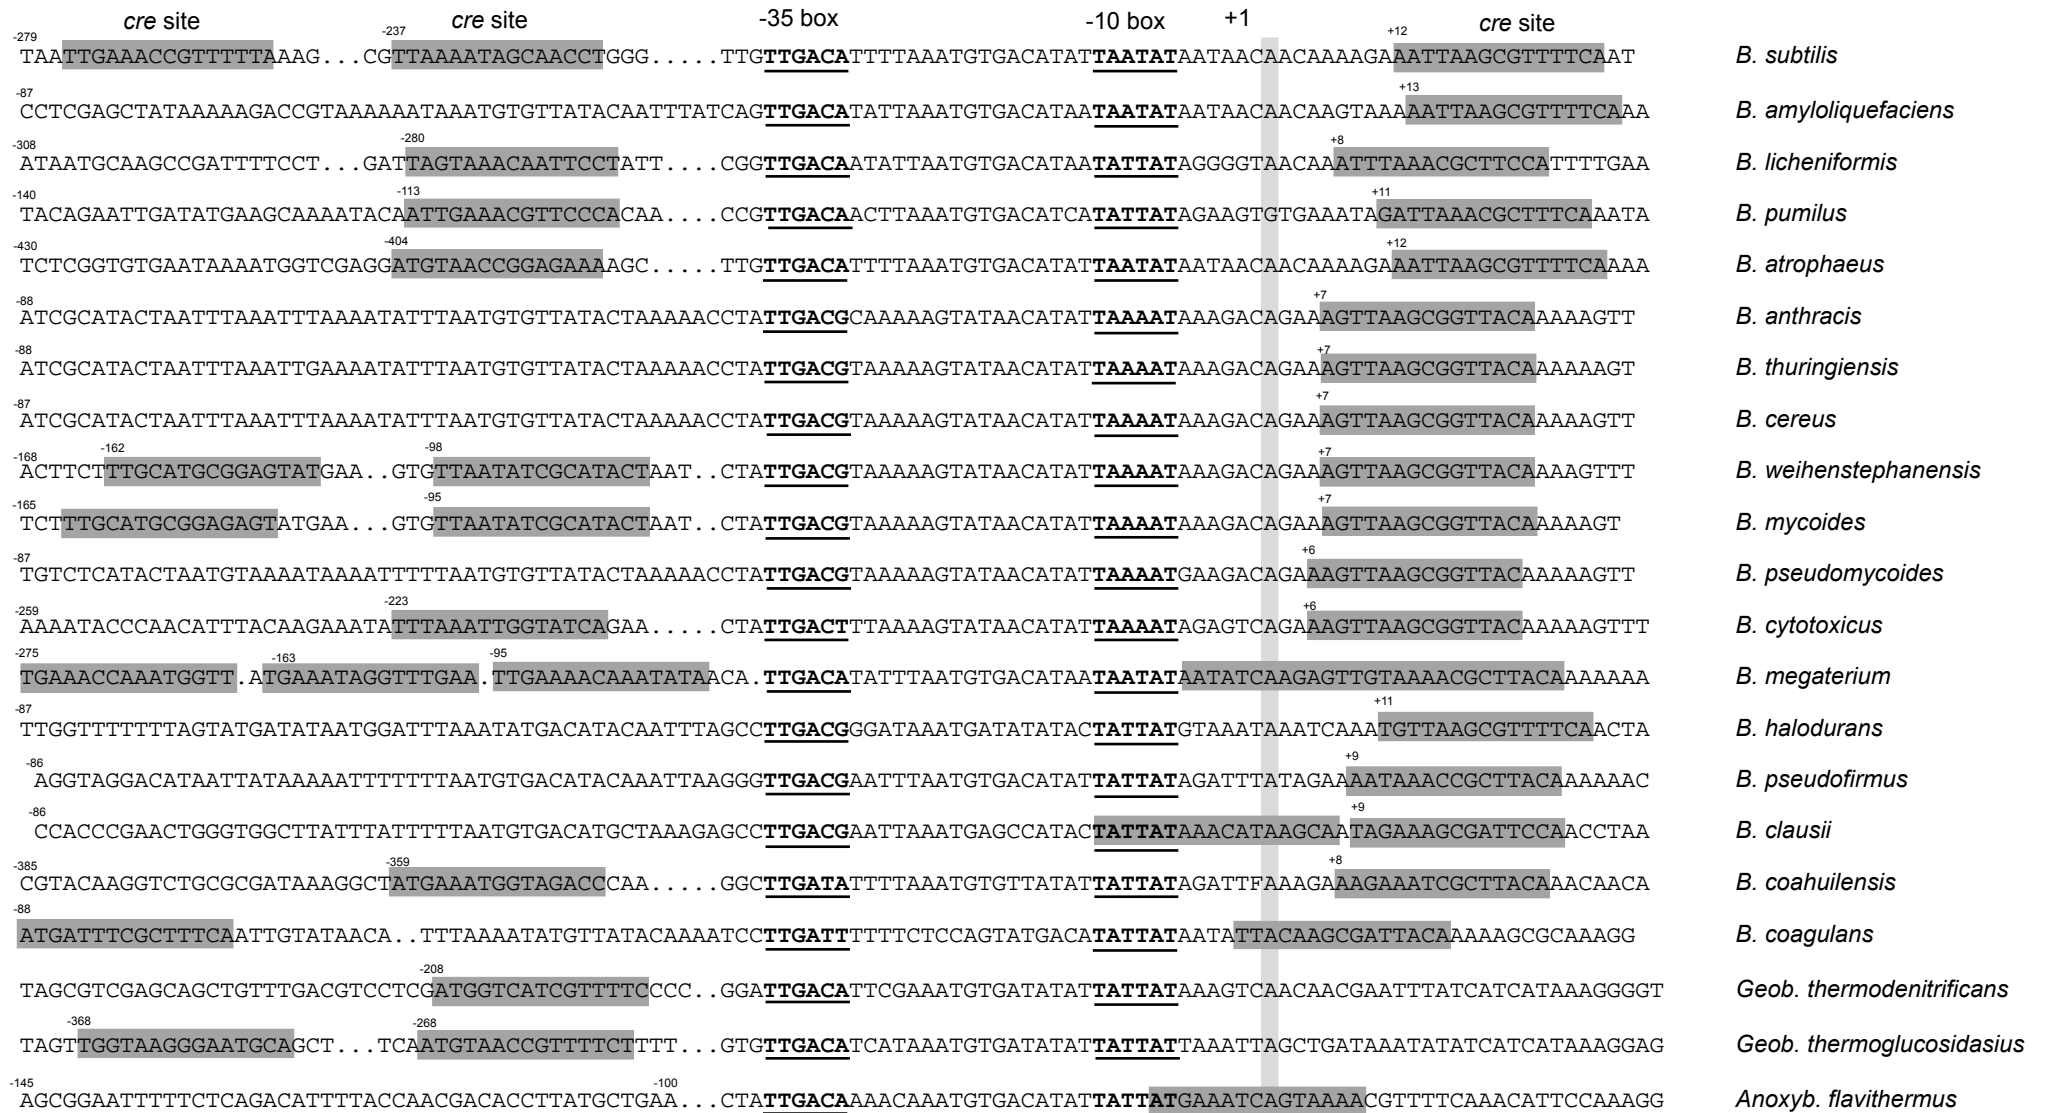

**Figure S4. Binding sites for CcpA in the promoter regions of the *sr1* homologues.**

Putative CcpA binding sites (*cre* sites). Hypothetical *cre* sites are shown in grey. The consensus sequence for the *B. subtilis* *cre* site is WTGNAANCGNWNWCW, thereby W = A or T, N = A, C, G or T. In the vicinity of or in the *sr1* promoters of *Geobacillus kaustophilus* and *Brevibacillus brevis*, no *cre* sites were found.

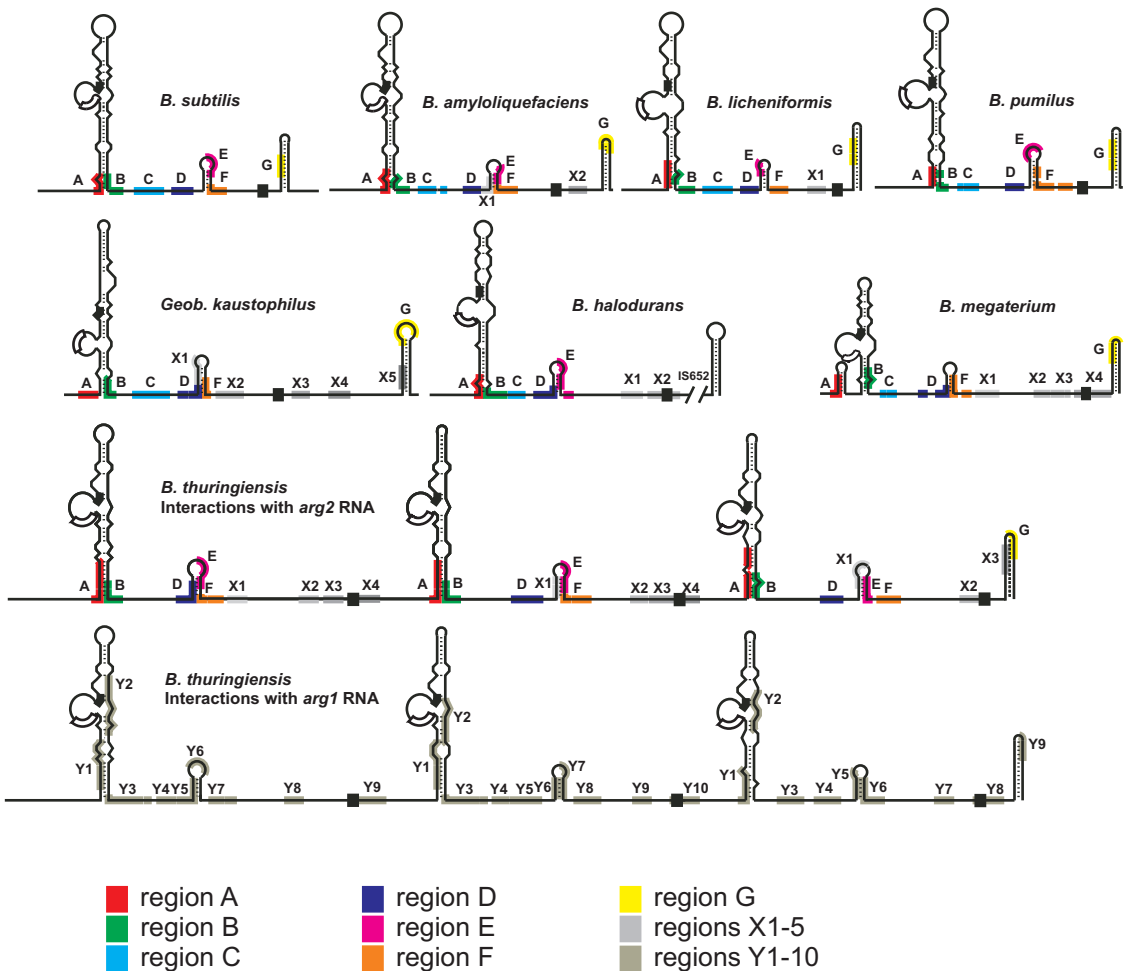

### Figure S5. Secondary structures of 8 SR1 homologues

The hypothetical secondary structures of the 8 SR1 homologues analysed in this work are shown. The secondary structure of *B. anthracis* SR1 corresponds to that of *B. thuringiensis*, and is, therefore, not shown. These structures were derived from the primary nt sequences on the basis of the experimentally determined secondary structure of *B. subtilis* SR1. SD sequences of SR1P are shown as white boxes, start and stop codons as black squares. The regions complementary to the respective *ahrC/arg2*-mRNAs are coloured as indicated below and designated with letters A to G and X1 to X5 according to Figs. S2 and S8. In *B. thuringiensis*, two *ahrC* homologues, *arg1* and *arg2*, are present. The upper structure shows the putative interactions for all three *sr1* subsequences with *arg2* mRNA which is homologous to *B. subtilis ahrC* mRNA, whereas the structure below shows its putative interactions with *arg1* mRNA. Here, the complementary regions are designated Y1 to Y10. In *B. halodurans*, the *sr1* gene is interrupted by IS652 that is inserted between the SR1P ORF and the transcription terminator. (For more details of the interactions see Table S3 and Fig. S8).

## Species

## SR1P sequence

|                                    |              |              |                                                            |                                      |                                                              |                          |              |              |
|------------------------------------|--------------|--------------|------------------------------------------------------------|--------------------------------------|--------------------------------------------------------------|--------------------------|--------------|--------------|
| <i>B. subtilis</i>                 | MGTIV        | CQDCN        | EAIHY                                                      | FEDEK                                | VTTLY                                                        | GTCCG                    | Q-CQC        | PVDEE        |
| <i>B. amyloliquefaciens</i>        | MGTIV        | CQDCN        | EAIHY                                                      | FEDEK                                | VTTLY                                                        | GTCCG                    | Q-CQC        | HLEEE        |
| <i>B. atrophaeus</i>               | MGTIV        | CQDCN        | EAIHY                                                      | FEDEK                                | VTTFY                                                        | GTCCG                    | Q-CQC        | HLEEE        |
| <i>B. licheniformis</i>            | MGTIV        | CQDCN        | ETIQH                                                      | FEDEK                                | VTILY                                                        | GTC-G                    | Q-CNC        | HLKEE E      |
| <i>B. pumilus</i>                  | MGTII        | CQDCN        | ETIDQ                                                      | FENEK                                | VTTLY                                                        | GTC-G                    | H-CHC        | CDEAS E      |
| <i>B. thuringiensis P1</i>         | MGTIV        | CQDCE        | GTIAH                                                      | FEDEK                                | VTVLY                                                        | GKC-G                    | S-CGC        | DHTEH TKAQ   |
| <i>B. thuringiensis P2</i>         | MGTIV        | CQDCE        | GTIGH                                                      | FEDEK                                | TTVLY                                                        | GKC-G                    | TNCDC        | ARKDN AKA    |
| <i>B. thuringiensis P3</i>         | MGTIV        | CQVCE        | GTIGH                                                      | FEDEK                                | STVLY                                                        | GKC-G                    | SHCEC        | DHKEH TKA    |
| <i>B. anthracis P1</i>             | MGTIV        | CQDCE        | GTIAH                                                      | FEDEK                                | VTVLY                                                        | GKC-G                    | S-CGC        | DHTEH TKAQ   |
| <i>B. anthracis P2</i>             | MGTIV        | CQDCE        | GTIGH                                                      | FEDEK                                | TTVLY                                                        | GKC-G                    | TNCDC        | ASKDN AKA    |
| <i>B. anthracis P3</i>             | MGTIV        | CQVCE        | GTIGH                                                      | FEDEK                                | STVLY                                                        | GKC-G                    | SHCDC        | DHKEH SKA    |
| <i>B. cereus P1</i>                | MGTIV        | CQDCE        | GTIAH                                                      | FEDEK                                | VTVLY                                                        | GKC-G                    | S-CGC        | DHTEH TKAQ   |
| <i>B. cereus P2</i>                | MGTIV        | CQVCE        | GTIGH                                                      | FEDEK                                | TTVLY                                                        | GKC-G                    | TNCDC        | ARKDN AKA    |
| <i>B. cereus P3</i>                | MGTIV        | CQVCE        | GTIGH                                                      | FEDEK                                | STVLY                                                        | GKC-G                    | SHCEC        | DHKEH TKA    |
| <i>B. weihenstephanensis P1</i>    | MGTIV        | CQDCE        | GTIAH                                                      | FEDEK                                | VTVLY                                                        | GKC-G                    | S-CGC        | DHTEH TKAQ   |
| <i>B. weihenstephanensis P2</i>    | MGTIV        | CQVCE        | GTIGH                                                      | FEDEK                                | TTVLY                                                        | GKC-G                    | TNCDC        | ASREN AKA    |
| <i>B. weihenstephanensis P3</i>    | MGTIV        | CQVCE        | GTIAH                                                      | FEDEK                                | STVLY                                                        | GKC-G                    | SHCEC        | DHTEH TKA    |
| <i>B. mycoides P1</i>              | MGTIV        | CQDCE        | GTIAH                                                      | FEDEK                                | VTVLY                                                        | GKC-G                    | S-CGC        | DHTEH TKAQ   |
| <i>B. mycoides P2</i>              | MGTIV        | CQVCE        | GTIGH                                                      | FEDEK                                | TTVLY                                                        | GKC-G                    | TNCDC        | ASKDN AKA    |
| <i>B. mycoides P3</i>              | MGTIV        | CQVCE        | GTIAH                                                      | FEDEK                                | STVLY                                                        | GKC-G                    | SHCEC        | DHKEH TKA    |
| <i>B. pseudomycoides P1</i>        | MGTIV        | CQDCE        | STIAH                                                      | FEDEK                                | VTVLY                                                        | GKC-E                    | F-CGC        | DHKEH TKAQ   |
| <i>B. pseudomycoides P2</i>        | MGTIV        | CQVCE        | GTIAH                                                      | FEDEK                                | TTVLY                                                        | GKC-G                    | SHCEC        | DHKEH TKAQ   |
| <i>B. pseudomycoides P3</i>        | MGTIV        | CQACE        | GTIAH                                                      | FEDEK                                | TTVLY                                                        | GKC-G                    | S-CGC        | DHKEH TKAQ   |
| <i>B. cytotoxicus P1</i>           | MGTIV        | CQDCE        | STIAH                                                      | FEDEK                                | VTILY                                                        | GKC-G                    | S-CGC        | SHKEH TKAQ   |
| <i>B. cytotoxicus P2</i>           | MGTIV        | CQDCE        | STIAY                                                      | FEEEK                                | TTVLY                                                        | GKC-G                    | SHCEC        | GHEKH VKA    |
| <i>B. megaterium</i>               | MGTIV        | CQTCN        | CTIDH                                                      | FEDEK                                | VTRLY                                                        | STCKS                    | GECQK        | ADEDL D      |
| <i>B. halodurans</i>               | MGTIV        | CQTCN        | QTIEH                                                      | FEVEK                                | VTTLY                                                        | AKCPS                    | --CND        | KKETK NER    |
| <i>B. pseudofirmus</i>             | MGTII        | CQNCN        | KTIEH                                                      | FEDEK                                | VTKLY                                                        | AQGHN                    | --CID        | CKSAK KQK    |
| <i>B. clausii</i>                  | MGTIV        | CQHNCN       | EAVEH                                                      | FEDEK                                | VSRLY                                                        | AVSSC                    | SRCQQ        | QTTEF LANK   |
| <i>B. coahuilensis</i>             | MGTIV        | CKSCL        | GTMEH                                                      | YDEEK                                | VTVLY                                                        | SDC-G                    | --CGE        | EEELQ D      |
| <i>B. coagulans</i>                | MGIIV        | CQSCD        | ATIDH                                                      | VEEEK                                | VSVLY                                                        | STCDQ                    | --CKH        | EEE          |
| <i>Geobac. kaustophilus</i>        | MGTIV        | CQTCD        | ATIAY                                                      | FEDEK                                | VTTLY                                                        | GKDCD                    | --CEH        | DNEGG EKE    |
| <i>Geobac. thermodenitrificans</i> | MGTIV        | CQACE        | ATIAY                                                      | FEDEK                                | VTTLY                                                        | GKDCD                    | --CDH        | DDEVE ERE    |
| <i>Geobac. thermoglucosidasius</i> | MGTIV        | CQTCD        | ATIAH                                                      | FEDEK                                | VTTLY                                                        | GKCSK                    | --CDC        | DTKED EQ     |
| <i>Anoxybacillus flavithermus</i>  | MGTIV        | CQTCN        | ATIDH                                                      | FEDEK                                | VTVLY                                                        | GQCCF                    | --CDC        | EDEE         |
| <i>Brevibacillus brevis</i>        | MGTIV        | CQTCG        | TIEEH                                                      | FESNS                                | VKTLY                                                        | AVCNC                    | D-CRP        | GERQE KE     |
| <b>Consensus</b>                   | <b>MGTIV</b> | <b>CQXCX</b> | <b>X<sup>A</sup><sub>T</sub>I<sup>Y</sup>X<sup>H</sup></b> | <b>FEDEK<sup>E</sup><sub>G</sub></b> | <b>VTVLY<sup>T</sup><sub>S</sub><sup>T</sup><sub>I</sub></b> | <b>GXCXX<sup>A</sup></b> | <b>XXCXX</b> | <b>XXXXX</b> |

### Figure S6. Alignment of SR1P homologues.

ClustalW alignment of SR1P homologues. The SR1P sequences from 23 species were aligned. In the case of the *B. cereus* group, three or two (*B. cytotoxicus*) aa sequences have to be considered, which were designated with P1, P2 and P3 in the order in which they are encoded on the *sr1* genes. Identical aa are highlighted in dark grey, less conserved aa in light grey. Below, a consensus sequence derived from all sequences is presented. Red, conserved aa, dark grey X indicates any aa.

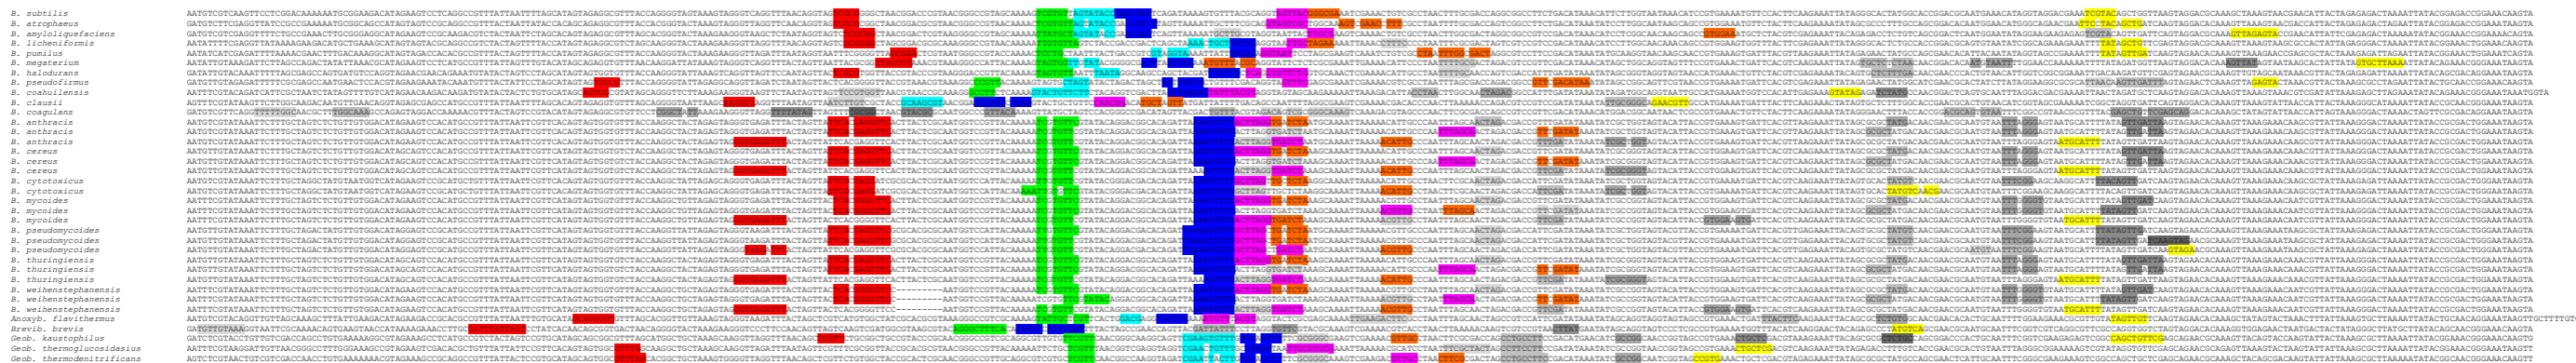

**Figure S7.** FASTA format text file of the ClustalW alignment of the *ahrC/arg* coding regions  
 Complementary regions are highlighted in colour as in Fig. S2.

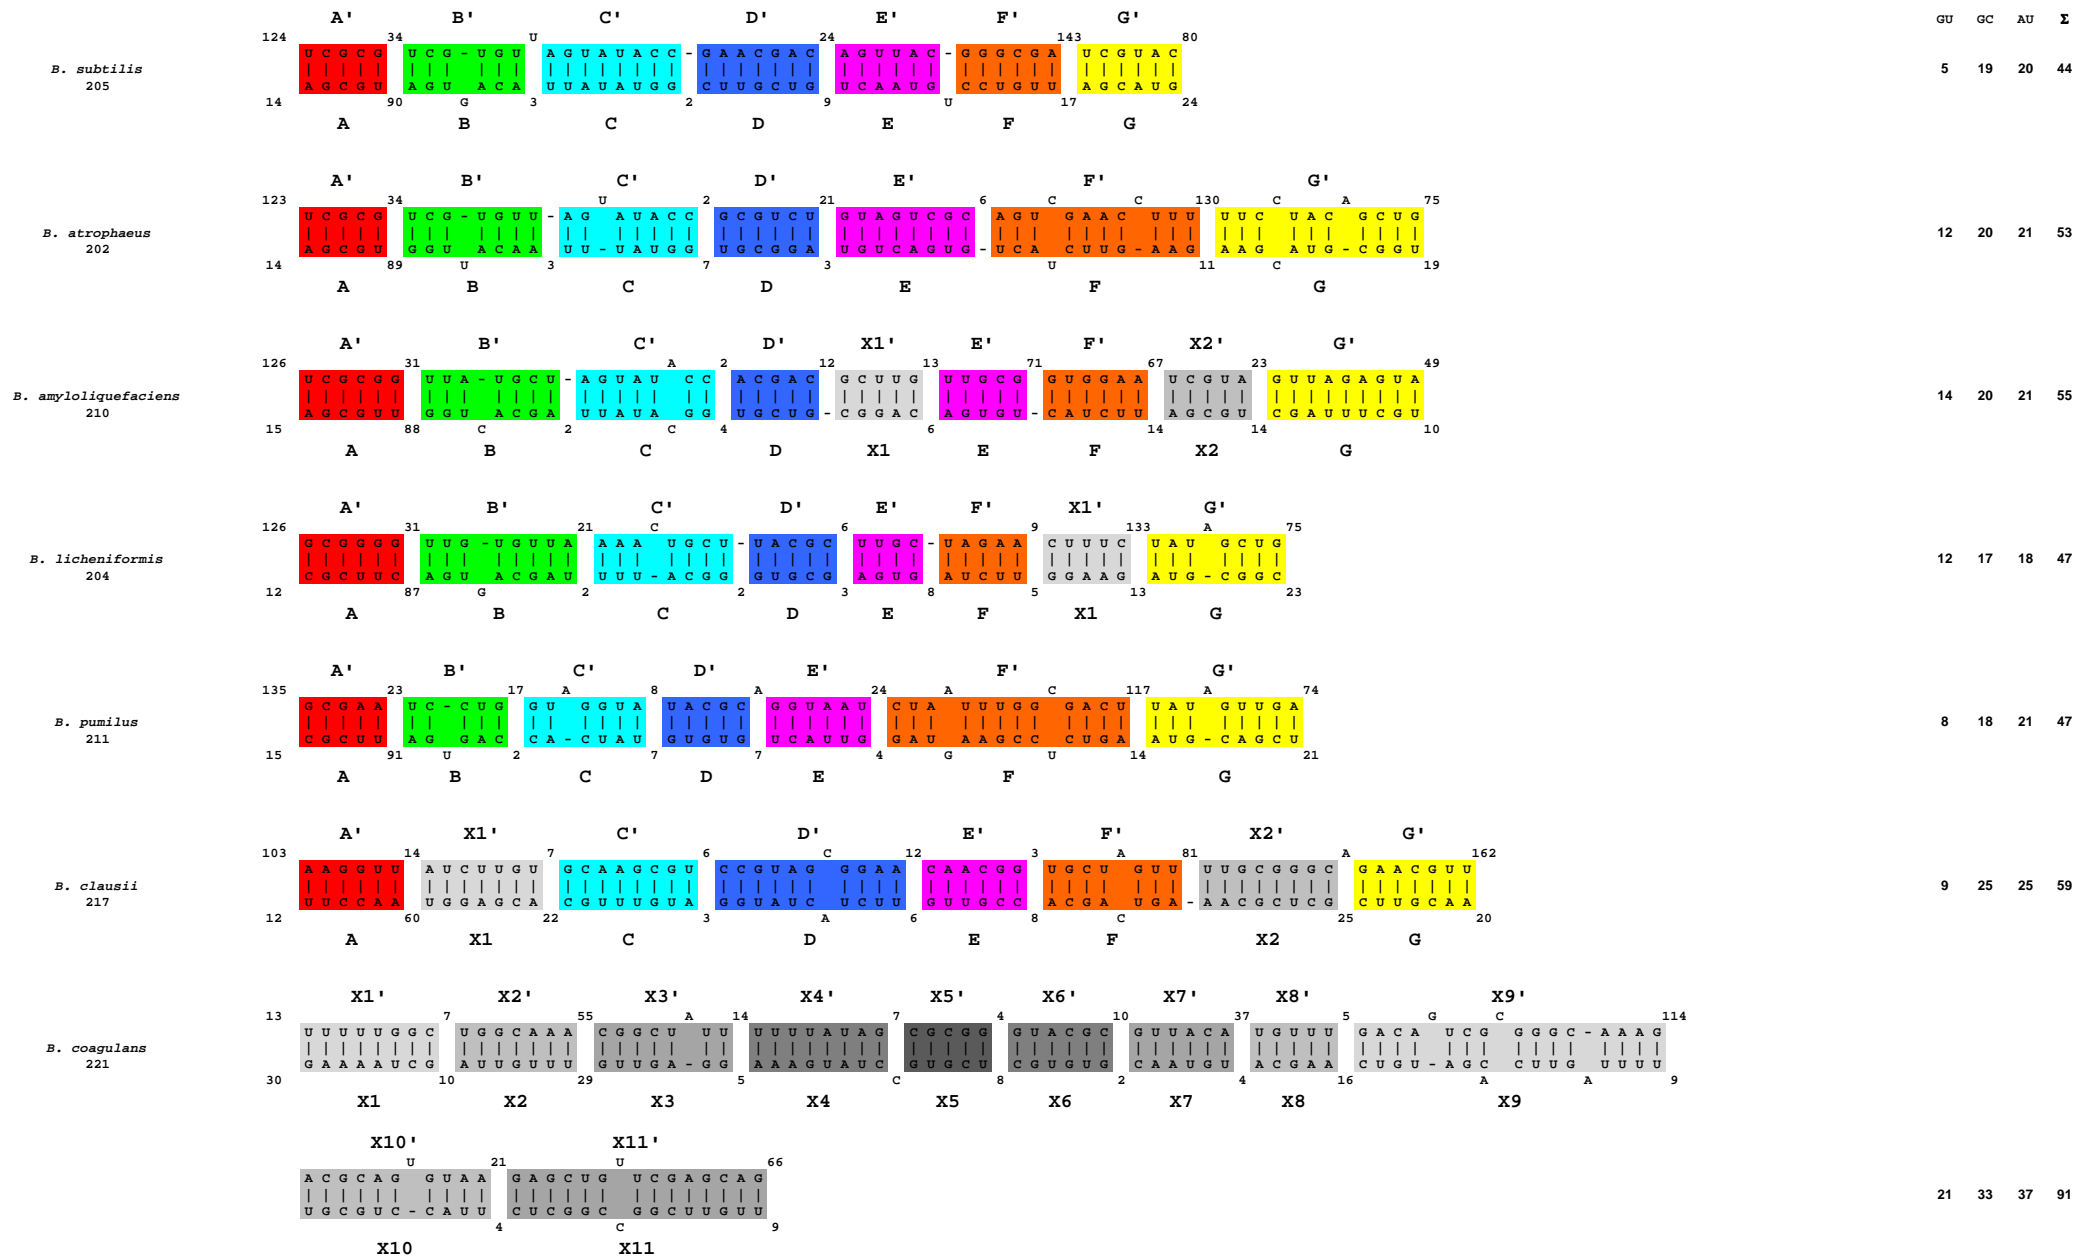



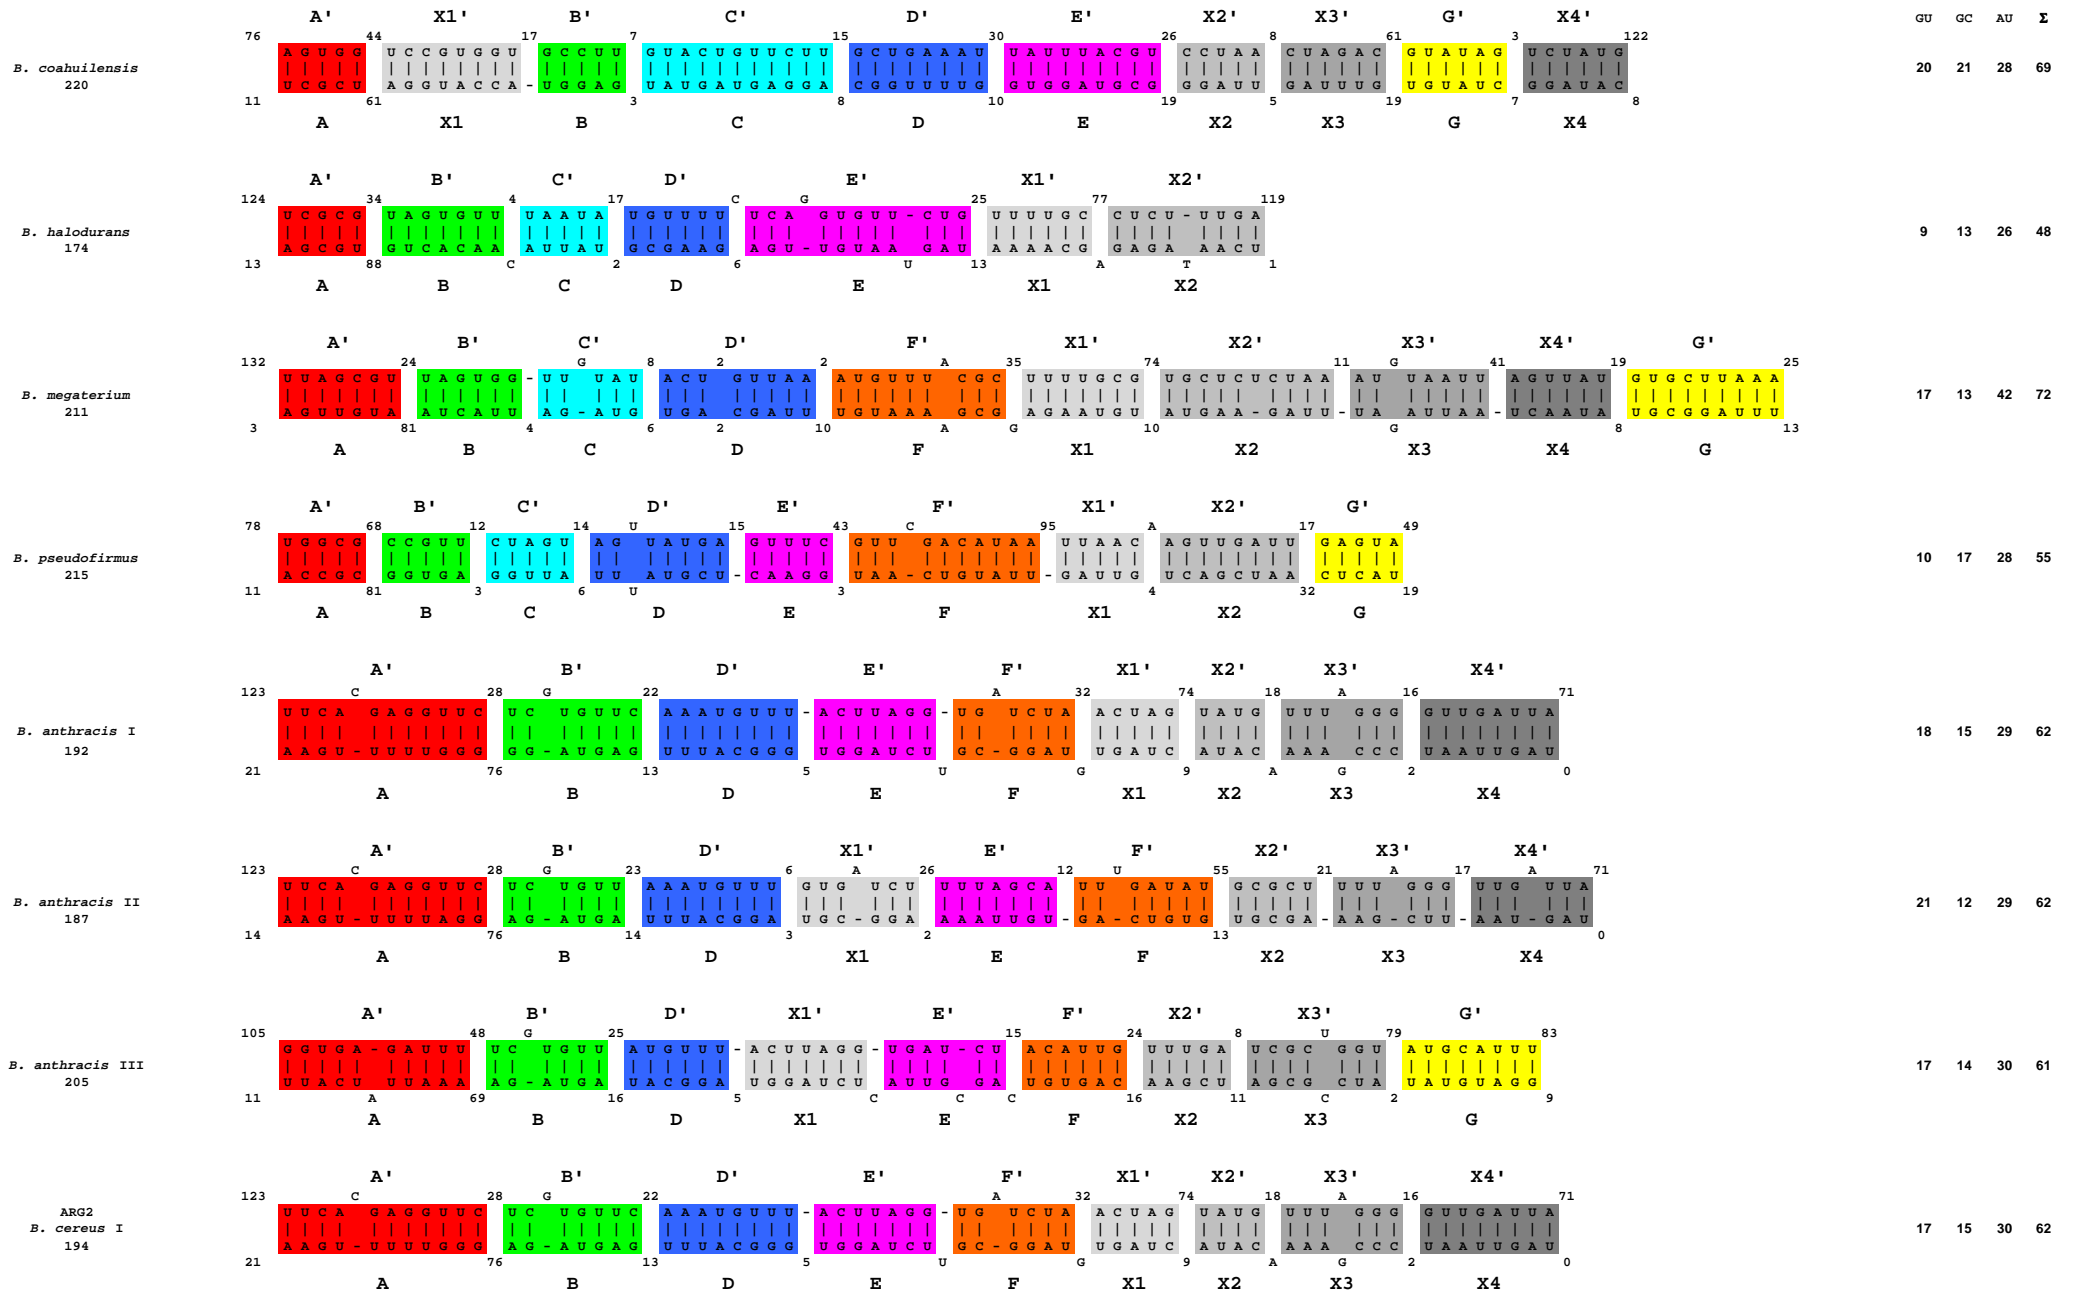

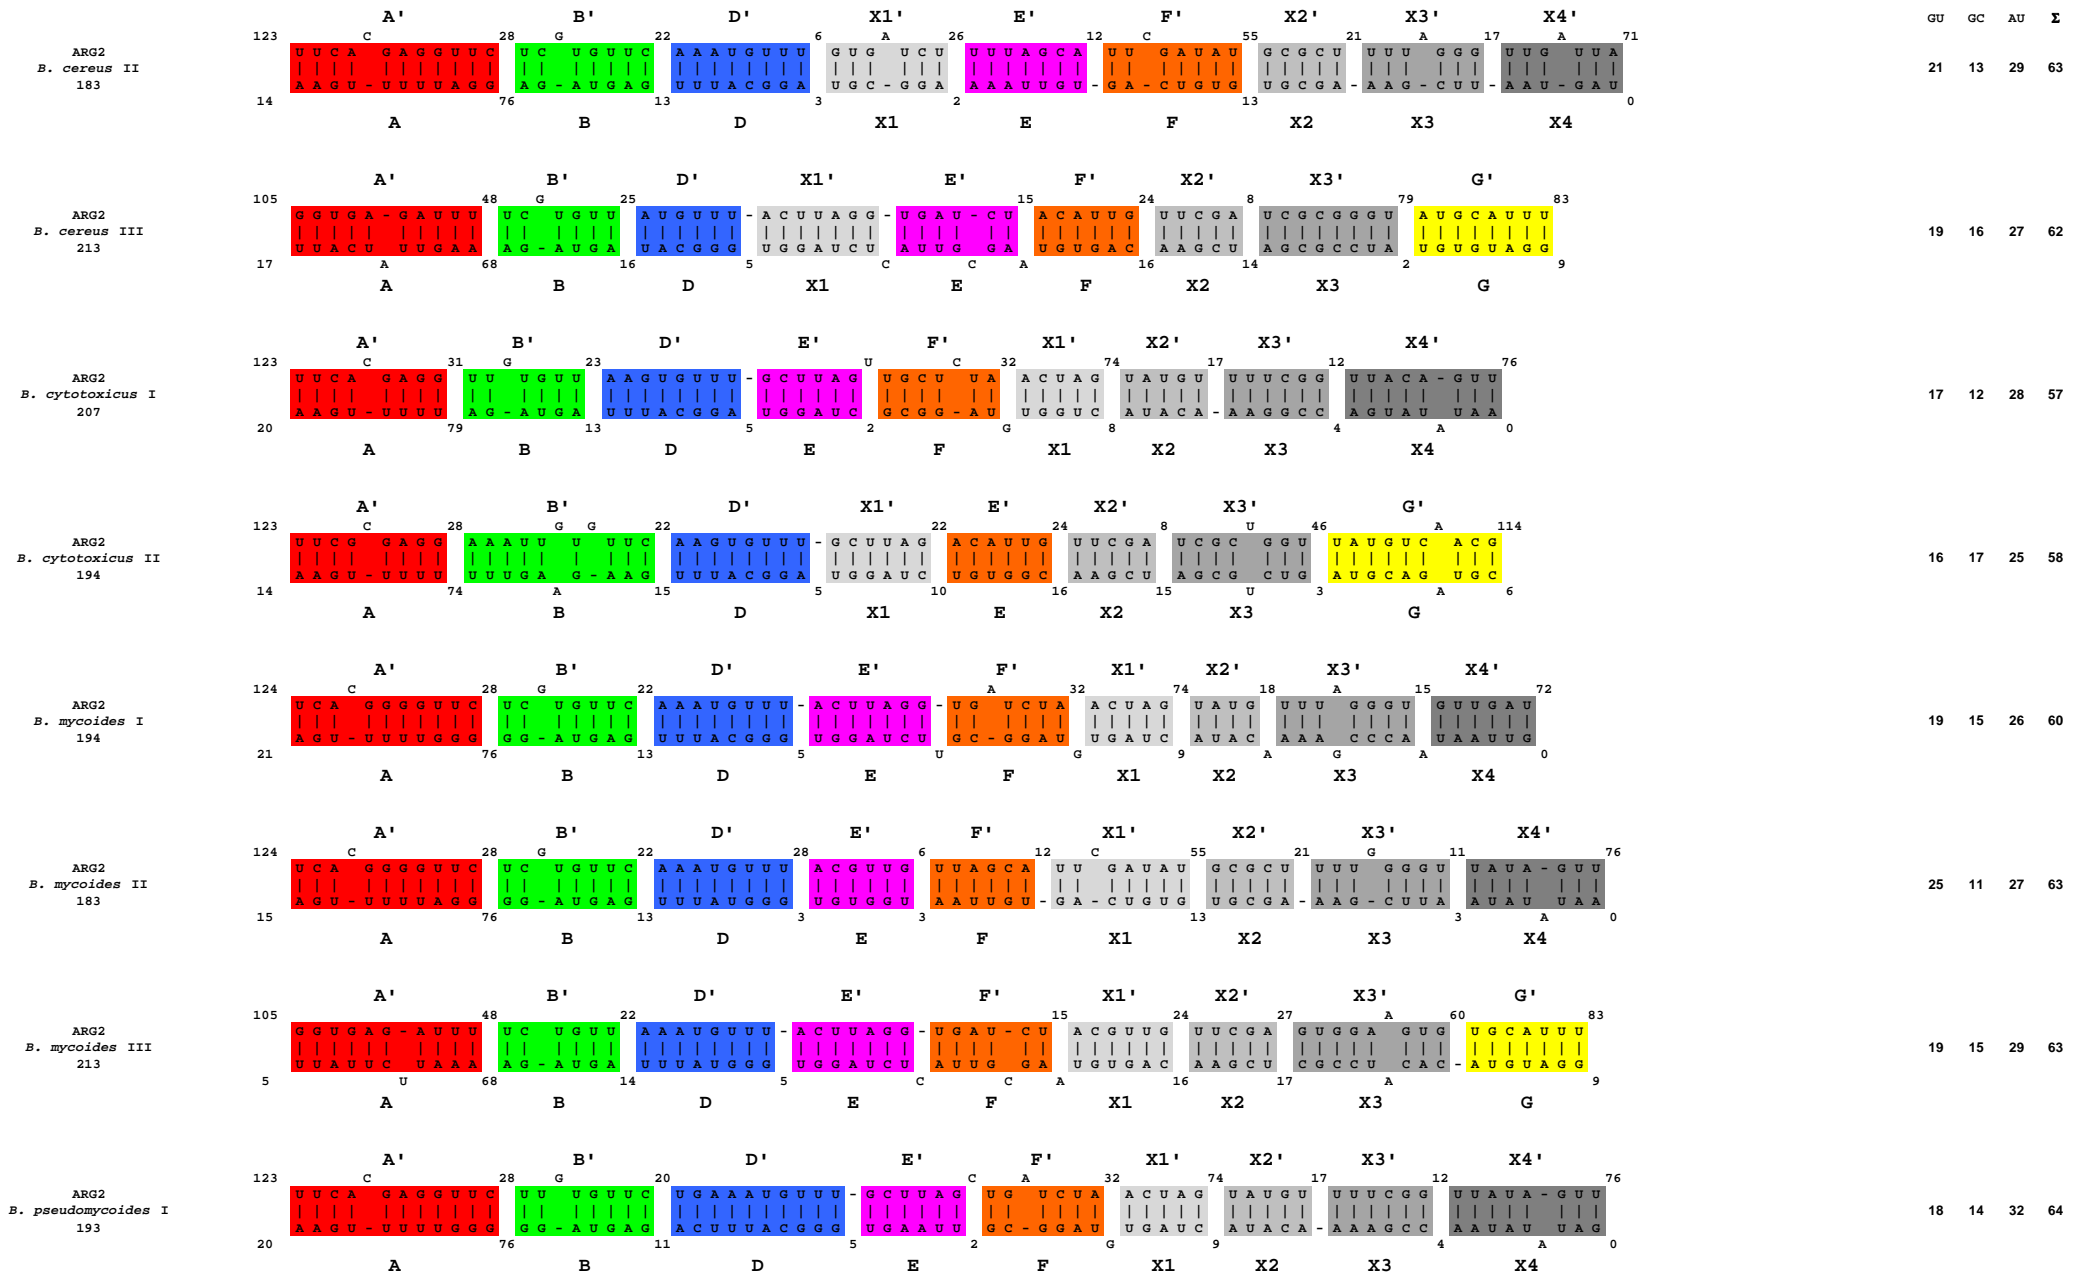

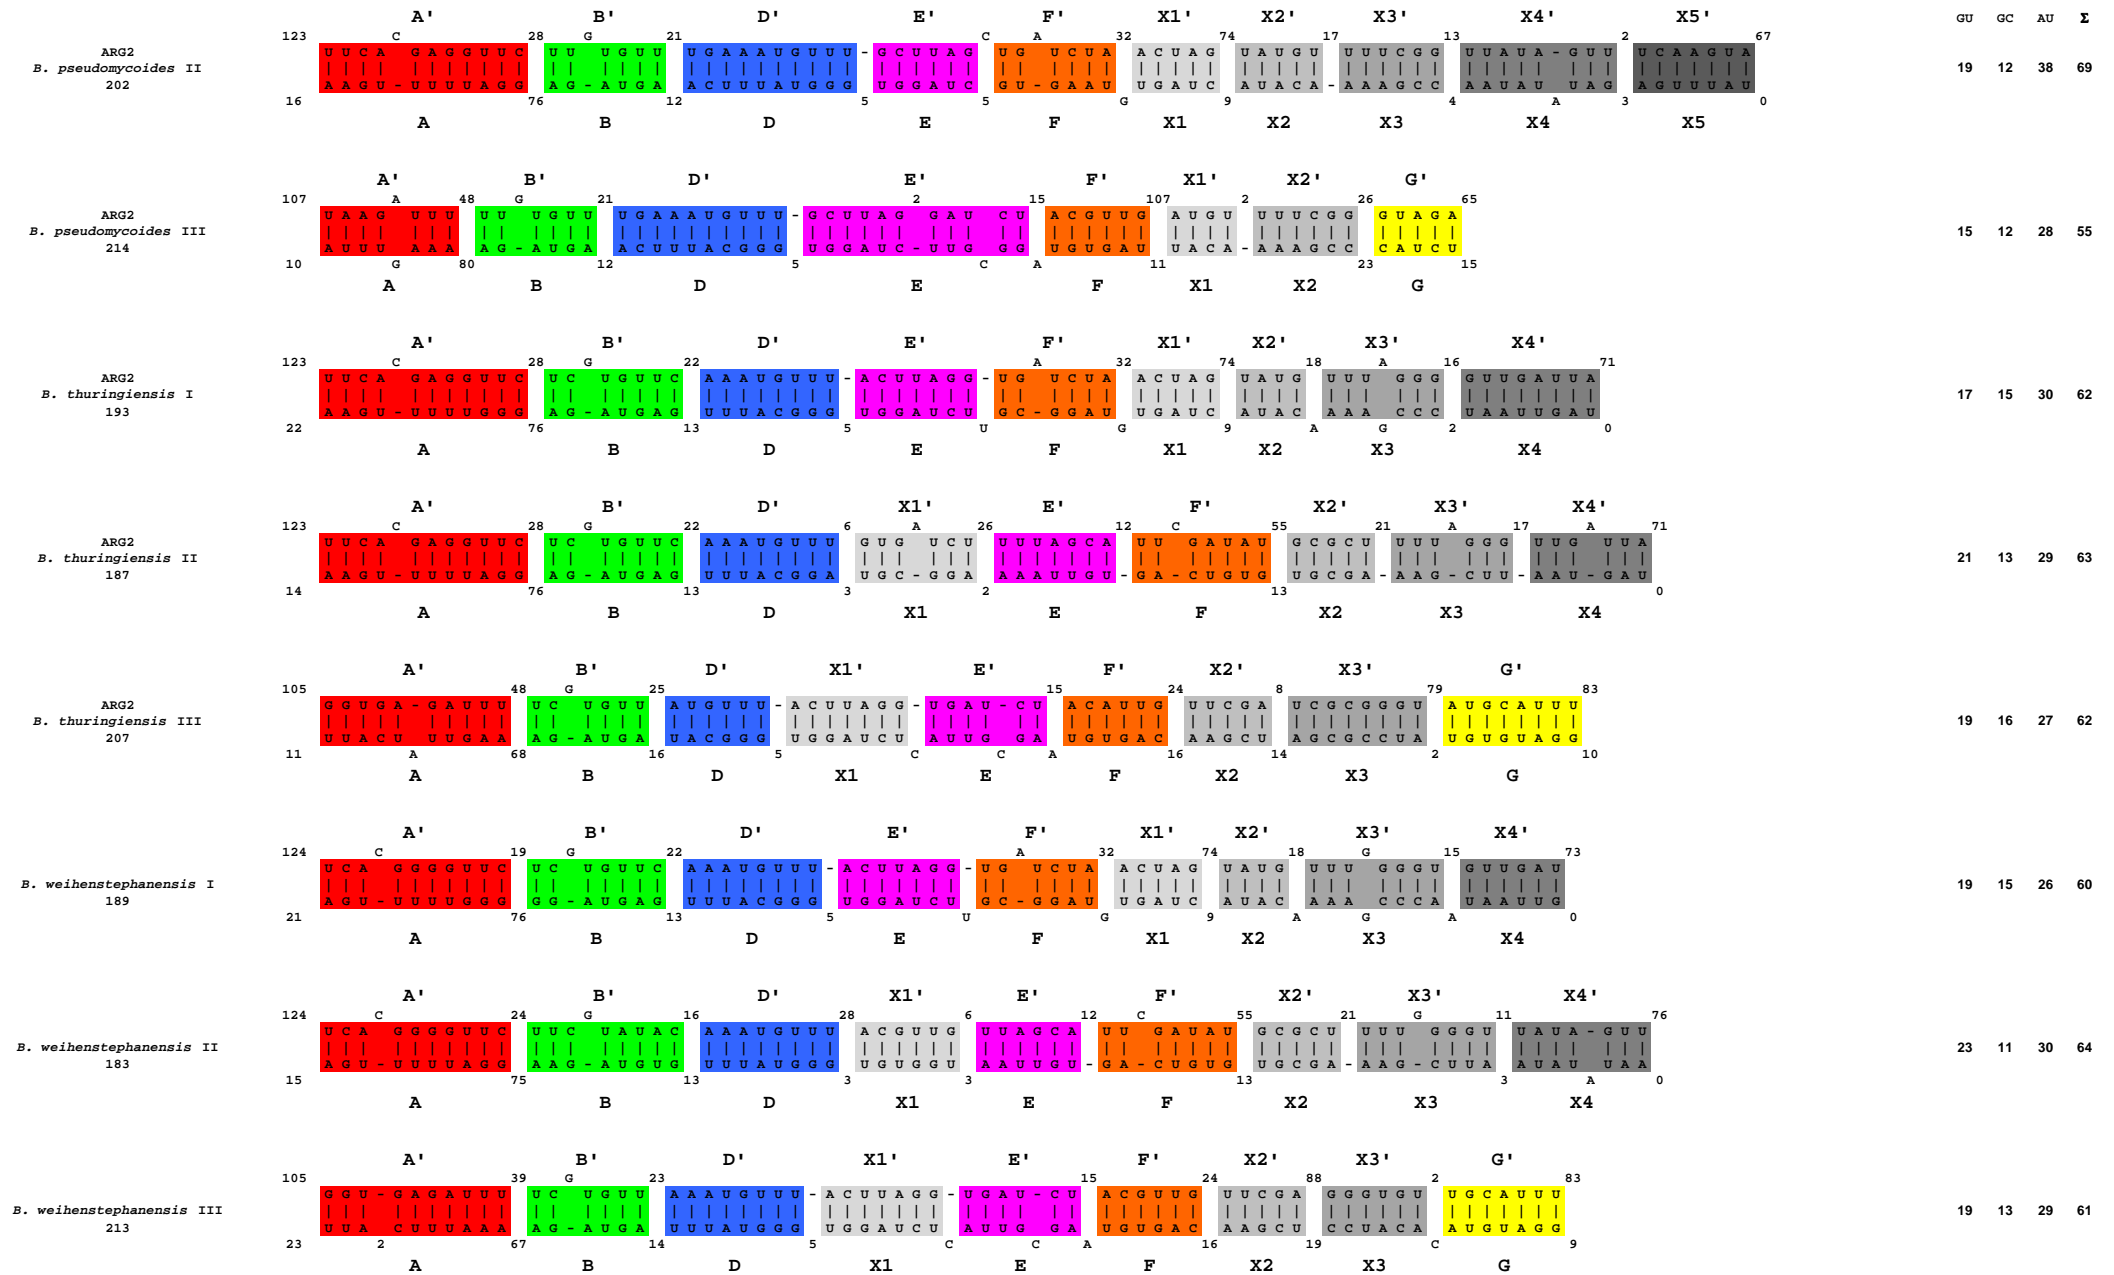

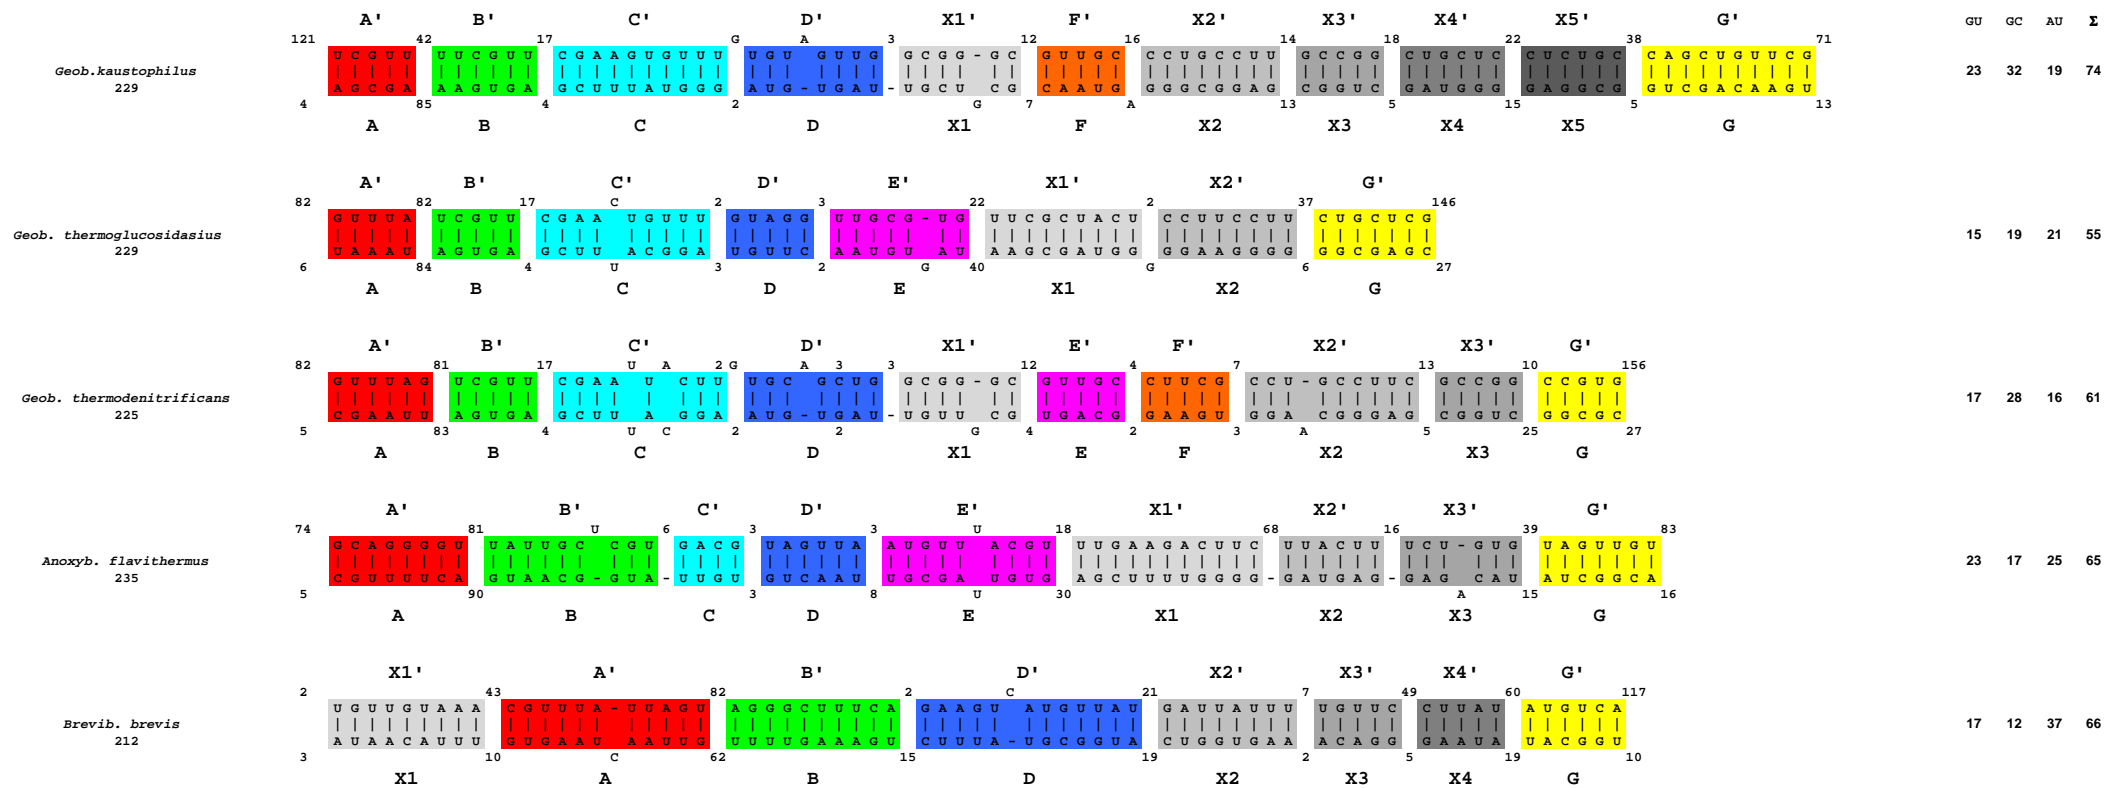





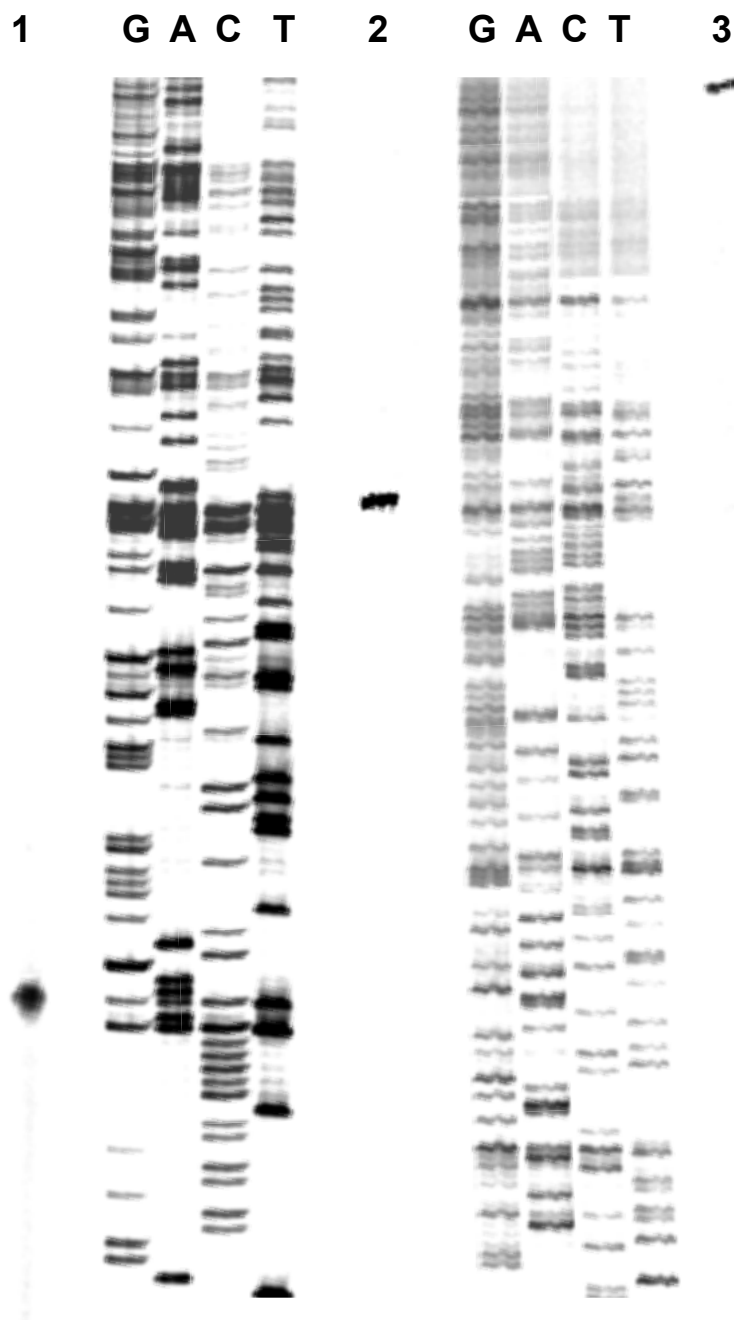

**Figure S9. Determination of 5' end of SR1 from *B. thuringiensis***

Lanes 1, 2 and 3 show primer extension reactions with total RNA prepared from *B. thuringiensis* grown in complex TY medium at 37 °C until onset of stationary phase ( $OD_{560} = 15$ ). For comparison, sequencing reactions were loaded. The following primers were used: lane 1, primer 1941 complementary to SR1-I; lane 2, primer SB1963 complementary to SR1-II and lane 3, primer SB1962 complementary to SR1-III. From all three reactions, the same 5' end of *B. thuringiensis* SR1 could be determined, which was used in the alignment in Figure S2. No indication for a processing event was found.





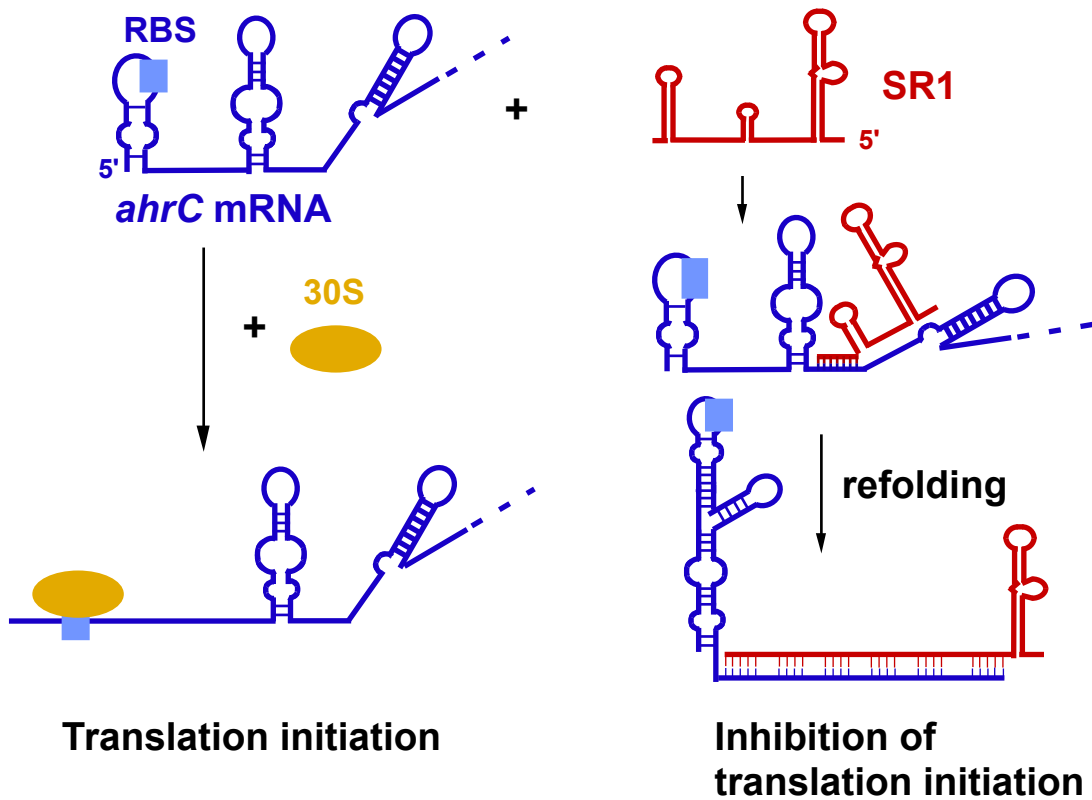

**Figure S11. Mechanism of action of *B. subtilis* SR1 on *ahrC* mRNA**

Red, SR1; blue, *ahrC* mRNA; light blue box, ribosome binding site (RBS); yellow, 30S ribosomal subunit. In the absence of SR1, the 30S subunit can bind to the *ahrC* SD sequence and initiate translation. Binding of SR1 ≈90 nt downstream of the *ahrC* SD sequence induces structural changes in *ahrC* mRNA immediately downstream of the RBS, which prevent 30S binding and, consequently, translation initiation. Based on (2).

**Table 1S: Oligodeoxyribonucleotides used in this study**

| Name    | Sequence                                             | purpose                                                   |
|---------|------------------------------------------------------|-----------------------------------------------------------|
| SB1434  | 5' TTT CAG TTG ACG GTA ACA                           | NB, gapA                                                  |
| SB1083  | AGG AGC AGA GAT GAT TAC                              | NB, gapA                                                  |
| SB303   | 5' GTA ATC CTT GCA TTC CTT CG                        | NB, SR1 <i>B. sub.</i> , <i>B. pum.</i> , <i>B. thur.</i> |
| SB309   | 5' GCG TAT TGA GGC GAT GCA CC                        | NB, SR1 <i>B. subtilis</i>                                |
| SB317   | 5' GAA TTC AAG CTT AAA AAA TAA AAA GCA TGC<br>GGC TT | all pWSR1 mutants                                         |
| SB348   | 5' TCG AGT TCA TGA AAA ACT                           | all pWSR1 mutants                                         |
| SB1623  | 5' CAT CAC AGC AAT GAC AGT                           | NB, SR1 <i>B. pumilis</i>                                 |
| SB1625  | 5' TGT GAT CAC ATC CGC AAG                           | NB, SR1 <i>B. thuringensis</i>                            |
| SB1750  | 5' GGG GAT GAG TAG ATG GGA                           | NB, SR1 <i>B. halodurans</i>                              |
| SB1751  | 5' TAT CAT TAC AAC TAG GGC                           | NB, SR1 <i>B. halodurans</i>                              |
| SB1752  | 5' GGG GAG TTT ACA AAA TGG                           | NB, SR1 <i>B. megaterium</i>                              |
| SB1753  | 5' TAA ATC TTC ATC TGC TTT                           | NB, SR1 <i>B. megaterium</i>                              |
| SB1754  | 5' GGG GTT TTG GGG ATG GGC                           | NB, SR1 <i>G. kaustophilus</i>                            |
| SB1755  | 5' TTC TCC GCC CTC ATT GTC                           | NB, SR1 <i>G. kaustophilus</i>                            |
| C767    | 5' GGG TGT GAC CTC TTC GCT ATC GCC ACC               | 5S rRNA probe <i>B. subtilis</i>                          |
| SB746   | 5' ACC CGA CAA GGA ATT TCG C                         | 23 S rRNA probe <i>B. subtilis</i>                        |
| SB1319  | 5' TGA TCT ACC CAT GTC CAG                           | 23 S rRNA probe <i>B. amyloliquef.</i>                    |
| SB1740  | 5' ACG GAA TTC AAG GAT TGC GTC ATA AAG               | <i>B. amyloliquefaciens</i> pACS54                        |
| SB1741  | 5' GCG GGA TCC TTG TTG TTA TTA TAT TAT               | <i>B. amyloliquefaciens</i> pACS54                        |
| SB1742  | 5' ACG GAA TTC ACC TTA AGC AGG AAT ACA               | <i>B. licheniformis</i> pACS55                            |
| SB1743  | 5' GCG GGA TCC TTG TTA CCC CTA TAA TAT               | <i>B. licheniformis</i> pACS55                            |
| SB1744  | 5' ACG GAA TTC TCG TAC TTA TAA ATA TGG               | <i>B. thuringiensis</i> pACS56                            |
| SB1745  | 5' GCG GGA TCC TTT CTG TCT TTA TTT TAA               | <i>B. thuringiensis</i> pACS56                            |
| SB 1726 | 5' ACG GAA TTC TAG ATA TGA TGC TAA GCG<br>TTC A      | <i>B. megaterium</i> pACS59                               |
| SB1727  | 5' GCG GGA TCC TTA CAA CTC TTG ATA TTA               | <i>B. megaterium</i> pACS59/66/67                         |
| SB1728  | 5' ACG GAA TTC ATG TTT TGA ACC AAC CAG CA            | <i>B. halodurans</i> pACS58                               |
| SB1729  | 5' GCG GGA TCC ACA TTT GAT TTA TTT ACA               | <i>B. halodurans</i> pACS58/64/65                         |
| SB1730  | 5' ACG GAA TTC CAA AAT ACA ATT GAA ACG T             | <i>B. pumilus</i> pACS57                                  |
| SB1731  | 5' GCG GGA TCC ATC TAT TTC ACA CTT CTA               | <i>B. pumilus</i> pACS57                                  |
| SB1748  | 5' ACG GAA TTC CGT ACG TAT AAA TAC GGC               | <i>B. anthracis</i> pACS60                                |
| SB1749  | 5' GCG GGA TCC TTT CTG TCT TTA TTT TAA               | <i>B. anthracis</i> pACS60                                |
| SB1746  | 5' ACG GAA TTC ATT GTA CCA TAT GTT GGC               | <i>G. kaustophilus</i> pACS61                             |
| SB1747  | 5' GCG GGA TCC CAC ATT TCA ATT GTC AAT               | <i>G. kaustophilus</i> pACS61                             |
| SB1450  | 5' ATA GAA TTC ATA AAA TGT GTT ATA CAG               | <i>B. subtilis</i> , pACS62                               |
| SB831   | 5' GCG GGA TCC TTT CTT TTG TTG TTA TTA               | <i>B. subtilis</i> , pACS62, pACS63                       |
| SB1448  | 5' GTA GAA TTC TTG ACA TTT TAA ATG TGA               | <i>B. subtilis</i> , pACS63                               |
| SB1782  | 5' ACG GAA TTC TAT GAC ATA CAA TTT AGC               | <i>B. halodurans</i> , pACS64                             |
| SB1783  | 5' ACG GAA TTC TTG ACG GGA TAA ATG ATA               | <i>B. halodurans</i> , pACS65                             |

|        |                                                                                           |                                                                          |
|--------|-------------------------------------------------------------------------------------------|--------------------------------------------------------------------------|
| SB1780 | 5' ACG GAA TTC TGT GAC ATA CTA ATT AGT                                                    | <i>B. megaterium</i> , pACS59/66                                         |
| SB1781 | 5' ACG GAA TTC TTG ACA TAT TTA ATG TGA                                                    | <i>B. megaterium</i> , pACS67                                            |
| SB1620 | 5' AGT AAG CTT AGA AAG TTA AGC GGT TAC                                                    | <i>B. thuringensis</i> , pWSR1/M51                                       |
| SB1619 | 5' GCC GCA TGC TTT TTT TTA TTT TTC GAA CTG<br>CGG GTG GCT CCA TTG GGC TTT TGT ATG CTC     | <i>B. thuringensis</i> , pWSR1/M51                                       |
| SB1622 | 5' AGT AAG CTT AAC AAG TAA AAA TTA AGC                                                    | <i>B. amyloliquefaciens</i> , pWSR1M52                                   |
| SB1621 | 5' GCC GCA TGC TTT TTT TTA TTT TTC GAA CTG<br>CGG GTG GCT CCA CTC TTC TTC AAG ATG ACA     | <i>B. amyloliquefaciens</i> , pWSR1M52                                   |
| SB1651 | 5' AGT AAG CTT TGA AAT AGA TTA AAC GCT                                                    | <i>B. pumilis</i> , pWSR1/M55                                            |
| SB1652 | 5' GCC GCA TGC TTT TTT TTA TTT TTC GAA CTG<br>CGG GTG GCT CCA TTC AGA GGC TTC ATC ACA     | <i>B. pumilis</i> , pWSR1/M55                                            |
| SB1662 | 5' AGT AAG CTT GGT AAC AAA TTT AAA CGC TTC CAT                                            | <i>B. licheniformis</i> , pWSR1/M57                                      |
| SB1661 | 5' GCC GCA TGC TTT TTT TTA TTT TTC GAA CTG<br>CGG GTG GCT CCA TTC TTC CTC TTT AAG ATG GCA | <i>B. licheniformis</i> , pWSR1/M57                                      |
| SB1706 | 5' GCC TCA TGC TTT TTT TTA TTT TTC GAA CTG<br>CGG GTG GCT CCA TCT CTC GTT TTT TGT TTC TT  | <i>B. halodurans</i> , pWSR1/M58                                         |
| SB1705 | 5' AGT AAG CTT AAA TCA AAT GTT AAG CGT                                                    | <i>B. halodurans</i> , pWSR1/M58                                         |
| SB1707 | 5' AGT AAG CTT AAG AGT TGT AAA ACG CTT                                                    | <i>B. megaterium</i> , pWSR1/M59                                         |
| SB1708 | 5' GCC GCA TGC TTT TTT TTA TTT TTC GAA CTG<br>CGG GTG GCT CCA ATC TAA ATC TTC ATC TGC TT  | <i>B. megaterium</i> , pWSR1/M59                                         |
| SB1702 | 5' AGT CTG CAG AAG CTT AGA AAG TTA AGC GGT TACA                                           | <i>B. anthracis</i> , pWSR1/M64/63<br><i>B. thuringensis</i> , pWSR1/M60 |
| SB1704 | 5' GCC GCA TGC TTT TTT TTA TTT TTC GAA CTG<br>CGG GTG GCT CCA TTG GGC TTT TGT ATG CAC TGT | <i>B. anthracis</i> , pWSR1/M64                                          |
| SB1703 | 5' AGT CTG CAG GGT ACC GAT GCA ATC GTT GCA ACA                                            | <i>B. anthracis</i> , pWSR1/M63<br><i>B. thuringensis</i> , pWSR1/M60    |
| SB1633 | 5' GCC GCA TGC TTT TTT TTA TTT TTC GAA CTG CGG<br>GTG GCT CCA TTC TTT TTC TCC GCC CTCA    | <i>G. kaustophilus</i> , pWSR1/M55                                       |
| SB1671 | ATG GGC ACG ATC GTA TGT CAA                                                               | <i>G. kaustophilus</i> , pWSR1/M55                                       |
| SB1555 | 5' GGT ACG ATT GTT TCC CAA GAT TCC AAC GAA<br>GCC ATT                                     | <i>B. subtilis</i> , pWSR1/M32                                           |
| SB1556 | 5' AAT GGC TTC GTT GGA ATC TTG GGA AAC AAT<br>CGT ACC                                     | <i>B. subtilis</i> , pWSR1/M32                                           |
| SB1628 | 5' GGA ACT TCC TCC GGA TAA TGT CAA TGT CCT GTT                                            | <i>B. subtilis</i> , pWSR1/M54                                           |
| SB1629 | 5' AAC AGG ACA TTG ACA TTA TCC GGA GGA AGT TCC                                            | <i>B. subtilis</i> , pWSR1/M54                                           |
| SB1402 | 5' GTC AAG CTT AAA AAA TAA AAAGCA TGC GGC<br>TTT AAG CCG CAT GCT TTT TTT TA               | pWSR1/MX, addition of<br>Strep-tag                                       |
| SB625  | 5' GAA ATT AAT ACG ACT CAC TAT AGG ACA AAA<br>GAA ATT AAG CGT                             | T7-SR1-up <i>B. subtilis</i>                                             |
| SB829  | 5' AGC CGC ATG CTT TTT TTT ACT                                                            | SR1-down <i>B. subtilis</i>                                              |
| SB643  | 5'GAA ATT AAT ACG ACT CAC TAT AGG TCG ACA<br>TGC TA AGC AGG A                             | T7-ahrC-up <i>B. subtilis</i>                                            |

|        |                                                                       |                                             |
|--------|-----------------------------------------------------------------------|---------------------------------------------|
| SB644  | 5' GTT ACA GCA GTT CAA GGA GC                                         | <i>ahrC</i> -down <i>B. subtilis</i>        |
| SB1874 | 5' GAA ATT AAT ACG ACT CAC TAT AGG AAG TAA<br>5' AAA TTA AGC GTT TTC  | T7-SR1-up <i>B. amyloliqu.</i>              |
| SB1950 | 5' CGA AAT CGG TTT CGG GCC T                                          | SR1-down <i>B. amyloliqu.</i>               |
| SB1878 | 5' GAA ATT AAT ACG ACT CAC TAT AGG TTG ACA<br>TGC TGA GAG AAG AAG     | T7- <i>ahrC</i> -up <i>B. amyloliqu.</i>    |
| SB1877 | 5' GCT ACA GCA GCT CCA AAA GAC                                        | <i>ahrC</i> -down <i>B. amyloliqu.</i>      |
| SB1881 | 5' GAA ATT AAT ACG ACT CAC TAT AGG TAA ATA<br>AAT AGA TTA CTA TTG     | T7-SR1-III-up <i>B. thuri.</i>              |
| SB1882 | 5' TTT CCT ACA CAT GTA GGC GCT                                        | SR1-III- down <i>B. thuri.</i>              |
| SB1883 | 5' GAA ATT AAT ACG ACT CAC TAT AGG ATG AAT<br>TAG TTG ATA TTT TAC     | T7- <i>arg2</i> -up <i>B. thuri.</i>        |
| SB1884 | 5' GTT ACA ACA TAT TTA AGA AAC                                        | <i>arg2</i> -down <i>B. thuri.</i>          |
| SB1885 | 5' GAA ATT AAT ACG ACT CAC TAT AGG AAC AAG<br>CGA ATT TAT CAT         | T7-SR1-up <i>G. kaustoph.</i>               |
| SB1886 | 5' ACA GAC TTG TCG ACA TGC GCG                                        | SR1-down <i>G. kaustoph.</i>                |
| SB1887 | 5' GAA ATT AAT ACG ACT CAC TAT AGG ACG AGC<br>TTG TCG ACC GGC TGA     | T7- <i>ahrC</i> -up <i>G. kaustoph.</i>     |
| SB1888 | 5' CCT AGA GCA TGG ACA ACA GCT                                        | <i>ahrC</i> -down <i>G. kaustoph.</i>       |
| SB1915 | 5' GAA ATT AAT ACG ACT CAC TAT AGG AAC AAA<br>TTT AAA CGC TTC TAT     | T7-SR1-up <i>B. licheniformis</i>           |
| SB1916 | CTG TAA ATG GCC GCA TGC TTT                                           | SR1-down <i>B. licheniformis</i>            |
| SB1938 | 5' GAA ATT AAT ACG ACT CAC TAT AGG AGC TTG<br>TCG ATA TTT TAA AGA CGG | T7- <i>ahrC</i> -up <i>B. licheniformis</i> |
| SB1939 | 5' TTA TAA AAG CTC CAA TAT TTT CTT CTG                                | <i>ahrC</i> -down <i>B. licheniformis</i>   |
| SB1919 | 5' GAA ATT AAT ACG ACT CAC TAT AGG AAA ACG<br>CTT ACA AA AAA GAC      | T7-SR1-up <i>B. megaterium</i>              |
| SB1955 | 5' GAA AAT CCG CAC CTT TTT TTA TTG                                    | SR1-down <i>B. megaterium</i>               |
| SB1921 | 5' GAA ATT AAT ACG ACT CAC TAT AGG CAA GGT<br>TTT AAT GTA ACA CAG     | T7- <i>ahrC</i> -up <i>B. megaterium</i>    |
| SB1922 | 5' TTA TAA CAT TTC TAA GAA TCG                                        | <i>ahrC</i> -down <i>B. megaterium</i>      |
| SB1900 | 5' GAA GCC GCC TTT CAA TTT CGA                                        | R-out 16S rRNA <i>B. thuri</i>              |
| SB1901 | 5' GAT GGA TRCC GTC CGC CGC TAA CTT CAT AAG A                         | R-in 16S rRNA <i>B. thuri</i>               |
| SB1894 | 5' GGA CAT TTT GAA GAT GAA AAA TCA                                    | R-out <i>B. thuri</i> SR1                   |
| SB1897 | 5' AGC GAA TTC TCT CAT TGC GAC TGT GAC CAT                            | R-in <i>B. thuri</i> SR1                    |
| SB1941 | 5' GTG TGC AAT TGT ACC TTC ACA ATC                                    | PT <i>B. thuri</i> SR1-I                    |
| SB1962 | 5' TTT CCC GTA TAG TAC TGT TGA TTT TTC                                | PT <i>B. thuri</i> SR1-III                  |
| SB1963 | 5' CCA CAT TTT CCG TAA AGT ACT GTC GTT                                | PT <i>B. thuri</i> SR1-II                   |

---

NB, oligos for Northern blots. Oligos designated with -up and -down were used in PCR for the generation of templates for *in vitro* transcription with T7 RNA polymerase. All other oligos were used for cloning, and the

resulting plasmids are shown at the right margin. R, primer for 3' RACE. PT, primer for primer extension.

**Table S2: Plasmids used in this study**

| Plasmid   | Description                                                                                                                                        | Reference  |
|-----------|----------------------------------------------------------------------------------------------------------------------------------------------------|------------|
| pWSR1     | tet-inducible overexpression vector for SR1, Km <sup>R</sup>                                                                                       | 17         |
| pWSR1/M25 | overexpression vector for Strep-tagged SR1P, Km <sup>R</sup>                                                                                       | 22         |
| pWSR1/M2  | as pWSR1, but with C6T                                                                                                                             | 22         |
| pWSR1/M3  | as pWSR1, but with D8L, C9T                                                                                                                        | 22         |
| pWSR1/M7  | as pWSR1, but with C28S, C29S                                                                                                                      | 22         |
| pACC1     | vector for integration of a <i>cggR-lacZ</i> fusion, Cm <sup>R</sup>                                                                               | 22         |
| pACT87    | vector for integration of a transcriptional<br><i>B. subtilis sr1-lacZ</i> fusion, Cm <sup>R</sup> , 87 nt upstream of -35 box of p <sub>sr1</sub> | 17         |
| pACS54    | as pACT87, but for <i>B. amyloliquefaciens</i>                                                                                                     | this study |
| pACS55    | as pACT87, but for <i>B. licheniformis</i>                                                                                                         | this study |
| pACS56    | as pACT87, but for <i>B. thuringiensis</i>                                                                                                         | this study |
| pACS57    | as pACT87, but for <i>B. pumilus</i>                                                                                                               | this study |
| pACS58    | as pACT87, but for <i>B. halodurans</i>                                                                                                            | this study |
| pACS59    | as pACT87, but for <i>B. megaterium</i>                                                                                                            | this study |
| pACS60    | as pACT87, but for <i>B. anthracis</i>                                                                                                             | this study |
| pACS61    | as pACT87, but for <i>Geobacillus kaustophilus</i>                                                                                                 | this study |
| pACS62    | as pACT87, but with only 19 nt upstream of the -35 box of p <sub>sr1</sub>                                                                         | this study |
| pACS63    | as pACT87, but with 0 nt upstream of the -35 box of p <sub>sr1</sub>                                                                               | this study |
| pACS64    | as pACS58, but with only 19 nt upstream of the -35 box of p <sub>sr1</sub>                                                                         | this study |
| pACS65    | as pACS58, but with only 0 nt upstream of the -35 box of p <sub>sr1</sub>                                                                          | this study |
| pACS66    | as pACS59, but with only 19 nt upstream of the -35 box of p <sub>sr1</sub>                                                                         | this study |
| pACS67    | as pACS59, but with only 0 nt upstream of the -35 box of p <sub>sr1</sub>                                                                          | this study |
| pWSR1/M51 | as pWSR1/M25, but for <i>B. thuringiensis</i> first SR1P1                                                                                          | this study |
| pWSR1/M52 | as pWSR1/M25, but for <i>B. amyloliquefaciens</i> SR1P                                                                                             | this study |
| pWSR1/M55 | as pWSR1/M25, but for <i>Geobacillus kaustophilus</i> SR1P                                                                                         | this study |
| pWSR1/M56 | as pWSR1/M25, but for <i>B. pumilus</i> SR1P                                                                                                       | this study |
| pWSR1/M57 | as pWSR1/M25, but for <i>B. licheniformis</i> SR1P                                                                                                 | this study |
| pWSR1/M58 | as pWSR1/M25, but for <i>B. halodurans</i> SR1P                                                                                                    | this study |
| pWSR1/M59 | as pWSR1/M25, but for <i>B. megaterium</i> SR1P                                                                                                    | this study |
| pWSR1/M64 | as pWSR1/M25, but for <i>B. anthracis</i> SR1P                                                                                                     | this study |
| pWSR1/M60 | as pWSR, but for entire <i>B. thuringiensis sr1</i> (encoding SR1P 1 to 3)                                                                         | this study |
| pWSR1/M65 | as pWSR1/M25, but for <i>B. thuringiensis</i> SR1P2                                                                                                | this study |
| pWSR1/M66 | as pWSR1/M25, but for <i>B. thuringiensis</i> SR1P3                                                                                                | this study |
| pWSR1/M32 | as pWSR1/M25, but with C6S, C9S                                                                                                                    | this study |
| pWSR1/M54 | as pWSR1/M25, but with C28S, C29S and Δ31-39                                                                                                       | this study |

**Table S3: Characteristics of SR1 homologues**

| Species                          | RNA length [nt] / identity [%] | SR1P length [nt] / identity [%] | Base-pairing interactions complementary regions / total number of pairings |         | Transcriptional terminator                |
|----------------------------------|--------------------------------|---------------------------------|----------------------------------------------------------------------------|---------|-------------------------------------------|
|                                  |                                |                                 | Arg2                                                                       | Arg1    |                                           |
| <i>B. subtilis</i>               | 205 / 100                      | 39 / 100                        | 7 / 44                                                                     |         | AAAAAAAGCATGCGGCTTAAAGCCGCATGCTTTTATTTTT  |
| <i>B. atrophaeus</i>             | 202 / 92                       | 39 / 90                         | 7 / 53                                                                     |         | AAAAGCATGCGGTGTAAAGCCGCATGCTTTTT          |
| <i>B. amyloliquefaciens</i>      | 210 / 88                       | 39 / 93                         | 9 / 55                                                                     |         | AAAAAGCCCCGAAACGATTTTCGTTTCGGGCTTCTTT     |
| <i>B. licheniformis</i>          | 204 / 87                       | 39 / 79                         | 8 / 47                                                                     |         | AAAAAAGCATGCGGCCATTTACAGTGCCGCATGCTTTTT   |
| <i>B. pumilus</i>                | 211 / 83                       | 39 / 79                         | 7 / 47                                                                     |         | AAAAAAGCATGCAGCTCCATTTGGGGCTGCATGTTCTTTTT |
| <i>B. megaterium</i>             | 213 / 82                       | 41 / 63                         | 10 / 73                                                                    |         | AAAAAAGGTGCGGATTTCCGCACCTTTTT             |
| <i>B. halodurans</i>             | 174 * / 82                     | 41 / 57                         | 7 / 48                                                                     |         | AAAAAAGACTCATCTATGGGGGAGATGAGCTTTTTTT     |
| <i>B. coahuilensis</i>           | 220 / 79                       | 38 / 45                         | 10 / 69                                                                    |         | AAAAAGATGTATCCGAGGACGGATACATCTTTTTT       |
| <i>B. coagulans</i>              | 220 / 81                       | 36 / 57                         | 11 / 91                                                                    |         | GGCCGGCTTGTTCGCCGGCTTTTTT                 |
| <i>B. clausii</i>                | 220 / 81                       | 45 / 55                         | 8 / 59                                                                     |         | GAACACCTTGCAAGGATGACTGCAAGGTGTTTTTTTT     |
| <i>B. pseudofirmus</i>           | 215 / 84                       | 41 / 53                         | 9 / 55                                                                     |         | AAAAGAGCATGCCCTCATAACGGGGGCATGCTTCTTTGTT  |
| <i>B. anthracis</i>              | 584                            |                                 |                                                                            |         | AAAAAAGCGCCTACATATGTAGGTGCTTTTTT          |
| <i>B. anthracis</i> I            | 195 / 83                       | 42 / 64                         | 9 / 62                                                                     |         |                                           |
| <i>B. anthracis</i> II           | 192 / 83                       | 42 / 57                         | 9 / 62                                                                     |         |                                           |
| <i>B. anthracis</i> III          | 197 / 82                       | 42 / 57                         | 9 / 61                                                                     |         |                                           |
| <i>B. thuringiensis</i>          | 587                            |                                 |                                                                            |         | GAAAAAGCGCCTACATGTGTAGGCGCTTTTTT          |
| <i>B. thuringiensis</i> I        | 196 / 85                       | 42 / 64                         | 9 / 62                                                                     | 9 / 69  |                                           |
| <i>B. thuringiensis</i> II       | 192 / 82                       | 42 / 57                         | 9 / 63                                                                     | 10 / 77 |                                           |
| <i>B. thuringiensis</i> III      | 199 / 80                       | 42 / 57                         | 9 / 62                                                                     | 9 / 65  |                                           |
| <i>B. cereus</i>                 | 586                            |                                 |                                                                            |         | GAAAAAGCGCCTACATGTGTAGGCGCTTTTTT          |
| <i>B. cereus</i> I               | 195 / 85                       | 42 / 64                         | 9 / 62                                                                     | 9 / 69  |                                           |
| <i>B. cereus</i> II              | 192 / 82                       | 42 / 57                         | 9 / 63                                                                     | 10 / 77 |                                           |
| <i>B. cereus</i> III             | 199 / 80                       | 42 / 57                         | 9 / 62                                                                     | 9 / 65  |                                           |
| <i>B. weihenstephanensis</i>     | 586                            |                                 |                                                                            |         | GAAAAAAGCGCCTACACATGTAGGCGTTTTTTT         |
| <i>B. weihenstephanensis</i> I   | 194 / 82                       | 42 / 64                         | 9 / 60                                                                     |         |                                           |
| <i>B. weihenstephanensis</i> II  | 192 / 82                       | 42 / 55                         | 9 / 64                                                                     |         |                                           |
| <i>B. weihenstephanensis</i> III | 200 / 78                       | 42 / 55                         | 9 / 63                                                                     |         |                                           |
| <i>B. mycoides</i>               | 586                            |                                 |                                                                            |         | GAAAAAAGCGCCTACACATGTAGGCGTTTTTTT         |
| <i>B. mycoides</i> I             | 194 / 82                       | 42 / 64                         | 9 / 60                                                                     |         |                                           |
| <i>B. mycoides</i> II            | 192 / 82                       | 42 / 57                         | 9 / 63                                                                     |         |                                           |
| <i>B. mycoides</i> III           | 200 / 77                       | 42 / 57                         | 9 / 63                                                                     |         |                                           |
| <i>B. pseudomycooides</i>        | 609                            |                                 |                                                                            |         | AAAAAAGCGCCTGCACATCTGCAGGCGCCTTTTTT       |
| <i>B. pseudomycooides</i> I      | 194 / 82                       | 42 / 64                         | 9 / 64                                                                     | 8 / 59  |                                           |
| <i>B. pseudomycooides</i> II     | 201 / 82                       | 43 / 59                         | 10 / 70                                                                    | 9 / 64  |                                           |
| <i>B. pseudomycooides</i> III    | 214 / 79                       | 42 / 57                         | 7 / 55                                                                     | 9 / 63  |                                           |
| <i>B. cytotoxicus</i>            | 413                            |                                 |                                                                            |         | AAAAAAGCGTCTGCGAATGCAGATGCTTTTTT          |
| <i>B. cytotoxicus</i> I          | 194 / 82                       | 42 / 67                         | 9 / 58                                                                     | 8 / 61  |                                           |
| <i>B. cytotoxicus</i> II         | 215 / 78                       | 42 / 57                         | 8 / 58                                                                     | 9 / 69  |                                           |
| <i>Anoxyb. flavithermus</i>      | 237 / 85                       | 37 / 64                         | 9 / 67                                                                     |         | GGGAAGGGATCGGCATAGCCGGTCTCTTTTT           |
| <i>Brev. brevis</i>              | 212 / 80                       | 41 / 58                         | 8 / 66                                                                     |         | AACAGGCCTACGGTAGGCCTGTTTTTTTT             |
| <i>Geob. kaustophilus</i>        | 229 / 83                       | 41 / 71                         | 11 / 74                                                                    |         | GGCGCGCATGTGACAAAGTCACATGCGCGCCGTTTATTTTT |
| <i>Geob. thermoglucosidasius</i> | 229 / 80                       | 41 / 67                         | 8 / 57                                                                     |         | GGCGAGCATGTGAAAGGGGCGCATGCTCGCCATTTTTTT   |
| <i>Geob. thermodenitrificans</i> | 225 / 81                       | 41 / 74                         | 10 / 61                                                                    |         | GGCGCACATGTGAAAGGGGCACATGTGCGCCATTTATTTTT |

23 SR1 homologues were identified. The three peptide-encoding sequences in the *B. cereus* group members are numbered with I, II and III. RNA and SR1P identities are relative to *B. subtilis* SR1 and SR1P, respectively. The base-pairing interactions with *arg2* RNA, which is highly homologous to *B. subtilis ahrC* RNA, and, in species that contain two *arg* genes, to *arg1* RNA, which contains the two arginine binding motifs, but is otherwise divergent from *arg2* RNA, are shown. The number of total pairings indicates the added number of base pairs of the 7 to 11 complementary regions. The exact location of all complementary regions for the single SR1 species is shown in Fig. S1.

\*exact length could not be determined due to insertion of IS652
